1 **Inhibition of vaccinia virus L1 *N*-myristoylation by the host *N*-myristoyltransferase inhibitor IMP-1088**  
2 **generates non-infectious virions defective in cell entry**

3

4

5

6 Lalita Priyamvada<sup>1\*</sup>, Wouter W. Kallemeijn<sup>2,3\*</sup>, Monica Faronato<sup>2,3</sup>, Kimberly Wilkins<sup>1</sup>, Cynthia S.  
7 Goldsmith<sup>4</sup>, Catherine A. Cotter<sup>5</sup>, Suany Ojeda<sup>5§</sup>, Roberto Solari<sup>6</sup>, Bernard Moss<sup>5</sup>, Edward W. Tate<sup>#2,3</sup>,  
8 Panayampalli Subbian Satheshkumar<sup>#1</sup>

9

10 <sup>1</sup>Poxvirus and Rabies Branch, Centers for Disease Control and Prevention, Atlanta, GA 30329. USA

11 <sup>2</sup>Department of Chemistry, Molecular Sciences Research Hub, Imperial College London, London W12  
12 OBZ, UK

13 <sup>3</sup>The Francis Crick Institute, 1 Midland Road, London NW1 1AT, United Kingdom.

14 <sup>4</sup>Infectious Diseases Pathology Branch, Centers for Disease Control and Prevention, Atlanta, GA 30329.  
15 USA

16 <sup>5</sup>Laboratory of Viral Diseases, National Institute of Allergy and Infectious Diseases, National Institutes of  
17 Health, Bethesda, MD 20892, USA.

18 <sup>6</sup>National Heart and Lung Institute, Imperial College of Science, Technology & Medicine, London W2 1PG,  
19 UK.

20

21 \*Equal contribution

22 <sup>§</sup>Clinipace, Morrisville, NC 27560, USA.

23 #Correspondence: [e.tate@imperial.ac.uk](mailto:e.tate@imperial.ac.uk) (E.W.T.), [spanayampalli@cdc.gov](mailto:spanayampalli@cdc.gov) (P.S.S.)

24 **ABSTRACT**

25 We have recently shown that the replication of rhinovirus, poliovirus and foot-and-mouth disease virus  
26 requires the co-translational *N*-myristoylation of viral proteins by human host cell *N*-  
27 myristoyltransferases (NMTs), and is inhibited by treatment with IMP-1088, an ultrapotent small  
28 molecule NMT inhibitor. Here, we reveal the role of *N*-myristoylation during vaccinia virus (VACV)  
29 infection in human host cells and demonstrate the anti-poxviral effects of IMP-1088. *N*-myristoylated  
30 proteins from VACV and the host were metabolically labelled with myristic acid alkyne during infection  
31 using quantitative chemical proteomics. We identified VACV proteins A16, G9 and L1 to be *N*-  
32 myristoylated. Treatment with NMT inhibitor IMP-1088 potently abrogated VACV infection, while VACV  
33 gene expression, DNA replication, morphogenesis and EV formation remained unaffected. Importantly,  
34 we observed that loss of *N*-myristoylation resulted in greatly reduced infectivity of assembled mature  
35 virus particles, characterized by significantly reduced host cell entry and a decline in membrane fusion  
36 activity of progeny virus. While the *N*-myristoylation of VACV entry proteins L1, A16 and G9 was inhibited  
37 by IMP-1088, mutational and genetic studies demonstrated that the *N*-myristoylation of L1 was the most  
38 critical for VACV entry. Given the significant genetic identity between VACV, monkeypox virus and variola  
39 virus L1 homologs, our data provides a basis for further investigating the role of *N*-myristoylation in  
40 poxviral infections as well as the potential of selective NMT inhibitors like IMP-1088 as broad-spectrum  
41 poxvirus inhibitors.

42

43

44

45 **KEYWORDS**

46 Vaccinia virus, *N*-myristoylation, *N*-myristoyltransferases (NMTs), IMP-1088, NMT inhibitor, virus entry,  
47 quantitative chemical proteomics, poxvirus, antivirals

## 48 INTRODUCTION

49 Vaccinia virus (VACV), the prototype member of the family *Poxviridae* and genus orthopoxvirus (OPXV) is  
50 closely related to variola virus (VARV), the causative agent of smallpox. VACV-induced immunity through  
51 smallpox vaccination cross-protected against VARV and led to its eradication [1]. The remaining VARV  
52 stocks and materials are consolidated and stored in two high containment laboratories for studies aimed  
53 to improve diagnostics, determine vaccine efficacies, and develop new antivirals [2]. Due to the  
54 discontinuation of smallpox vaccination programs and waning immunity, a vast majority of the global  
55 population is immunologically naïve to smallpox and will require intervention by vaccination or antivirals  
56 for pre- and post-exposure therapeutics in the event of an exposure. To this end, we are interested in  
57 exploring the importance of post-translational modifications (PTMs) of viral proteins for the viral life  
58 cycle, and whether interference in PTMs is a potential antiviral strategy against OPXV.

59  
60 *N*-myristoylation, a lipidic co- and post-translational modification of many eukaryotic proteins, involves  
61 the attachment of myristic acid, a 14-carbon saturated fatty acid, to the glycine (G) residue at the protein  
62 N-terminus [3-5]. The addition of the myristic acid moiety is catalyzed by *N*-myristoyltransferase  
63 enzymes (NMTs) and occurs after the removal of the initiator methionine (M) residue from the N-  
64 terminal “MG” motif by methionine aminopeptidases [4]. In humans, NMT exists in two isoforms, NMT1  
65 and NMT2, which are highly conserved across all mammals [6]. The *N*-myristoylation of proteins by NMTs  
66 can have different effects on the substrate such as membrane anchoring, which in turn facilitates cellular  
67 processes involving protein localization, protein-protein interactions and signaling [7-9]. Recently,  
68 unbiased chemical biology approaches using a myristic acid analog (YnMyr, tetradec-13-ynoic acid) for  
69 metabolic incorporation, bio-orthogonal modification and enrichment by pulldown followed by mass  
70 spectrometry were successful in identifying the global cellular content of *N*-myristoylated proteins in  
71 human cells [10-12]. The viability of several pathogens, including various parasites and viruses, has been  
72 shown to be dependent on protein *N*-myristoylation. While parasites like *Plasmodium* and *Trypanosoma*  
73 encode their own NMT, host NMTs are usurped by viruses [13]. *N*-myristoylation of viral proteins is  
74 observed or predicted in families ranging from RNA to nucleo-cytoplasmic large DNA viruses, including  
75 *Picornoviridae*, *Arenaviridae*, *Reoviridae*, *Retroviridae*, *Hepadnaviridae*, *Polyomaviridae*, *Ascoviridae*,  
76 *Herpesviridae*, *Poxviridae*, *Asfiviridae* and *Iridoviridae* [13].

77

78 Previously, we identified and characterized small molecule inhibitors against *Plasmodium*, *Leishmania*  
79 and *Trypanosoma* NMTs [14-17], which were subsequently developed into inhibitors with high specificity  
80 and potency against human NMTs [18]. We further showed that one of these small molecules, IMP-1088,  
81 a sub-nanomolar EC<sub>50</sub> dual inhibitor of human NMT1 and NMT2, blocked rhinovirus replication at low  
82 nanomolar concentrations [19]. The loss of *N*-myristoylation induced by IMP-1088 hampered viral  
83 replication and virus-induced cell death by blocking viral capsid assembly while causing minimal  
84 cytotoxicity in multiple rhinovirus strains, poliovirus and foot-and-mouth disease virus [19]. To  
85 determine whether the antiviral activity of IMP-1088 extends beyond picornaviruses to other viruses  
86 that require *N*-myristoylation, we evaluated its *in vitro* efficacy against VACV.

87

88 The VACV genome encodes over 200 open reading frames, including 11 proteins with a putative *N*-  
89 myristoylation motif (MG, at the N-terminus). Using radio-labelled myristic acid, four proteins (A16, E7,  
90 G9 and L1) were previously determined to undergo *N*-myristoylation [20]. Three of these proteins (A16,  
91 G9 and L1) are membrane proteins that associate and form the entry/fusion complex (EFC) required for  
92 virus entry [21]. While *N*-myristoylation was not required for membrane localization of L1, mutation of  
93 the glycine to an alanine in the N-terminal “MG” motif rendered VACV non-infectious [22]. Additional  
94 VACV proteins with predicted *N*-myristoylation motifs are involved in functions ranging from  
95 morphogenesis (membrane formation), DNA repair and genome formation, to virus spread and host  
96 range factors (Supplementary Table 1). Given the wide range of functions associated with the putatively  
97 *N*-myristoylated VACV proteins, we explored whether the intracellular inhibition of host NMT by IMP-  
98 1088 affects VACV replication.

99

100 The objectives of this study were to: 1) identify host and viral *N*-myristoylated proteins during VACV  
101 infection by quantitative chemical proteomics, 2) assess the impact of IMP-1088 on host and viral protein  
102 *N*-myristoylation, and 3) evaluate the inhibitory effect of IMP-1088 on VACV infection. Our results  
103 demonstrate that IMP-1088 potently inhibits VACV infection and spread with minimal cytotoxicity *in*  
104 *vitro*. We find that the VACV proteins A16, G9 and L1 undergo *N*-myristoylation, with L1 most strongly  
105 and significantly responding to NMT inhibition by IMP-1088. Moreover, loss of *N*-myristoylation resulted  
106 in the generation of entry-defective VACV virions while not significantly affecting viral gene expression,  
107 DNA replication, morphogenesis and viral egress. Taken together, our data demonstrate that blocking  
108 the host cell driven *N*-myristoylation of VACV protein L1 is a potent anti-VACV antiviral strategy.

109

## 110 **RESULTS**

111 **IMP-1088 inhibits VACV spread and virus yield.** To determine the impact of NMT inhibitor IMP-1088  
112 treatment on VACV infection, we quantified virus yield, spread, and cellular cytotoxicity at different IMP-  
113 1088 concentrations upon infection of HeLa cells with VACV WR-GFP (0.3 multiplicity of infection, MOI)  
114 as illustrated in Figure 1A. A reduction of >50% in both virus yield (Figure 1B) and viral spread (Figure 1C)  
115 was measured at approximately 100 nM, indicating that IMP-1088 is a potent inhibitor of VACV infection.  
116 No cellular toxicity was observed in the presence of up to 10  $\mu$ M IMP-1088, a concentration nearly 100-  
117 fold higher than its EC<sub>50</sub>, yielding a selectivity index >100 (Figure 1D).

118

119 **Quantitative chemical proteomics demonstrate inhibition of host and VACV L1 *N*-myristoylation by**  
120 **IMP-1088.**

121 Metabolic labelling with YnMyr, an alkyne-tagged myristic acid analog, allows the identification and  
122 quantification of *N*-myristoylated proteins encoded in the proteome of both the host and VACV, and  
123 provides quantitative insights induced by blocking NMT activity via IMP-1088.

124 In a multiparameter chemical proteomics experiment, we examined the effect of VACV infection on  
125 proteins enriched following YnMyr labelling, and in the presence or absence of NMT inhibitor IMP-1088.  
126 As shown in Figure 2A, after robust statistical testing of the chemical proteomics data, we identified 115  
127 VACV proteins (out of 220), of which 3 are significantly enriched after YnMyr labelling: A16, G9 and L1.  
128 Analysis of the VACV proteome, retrieved from UniProt, revealed that VACV may express 11 proteins  
129 with a glycine at the second position (after the initiator methionine, see Supplementary Table 1),  
130 including the proteins A16, G9 and L1 identified by chemical proteomics. This evidence suggests A16, G9  
131 and L1 are likely to be *N*-myristoylated.

132 Given the VACV proteome may contain additional putative NMT substrates, we analyzed the reduction  
133 of YnMyr labelling in the presence of NMT inhibitor IMP-1088 (Figure 2B and Supplementary Figure 1).  
134 In-depth analysis of label-free quantification (LFQ) intensities revealed that YnMyr-dependent  
135 enrichment of A16, G9 and L1 is depleted to background levels upon loss of *N*-myristoylation due to NMT  
136 inhibition (Figure 2B). Statistical significance could not be calculated for the change in L1 enrichment  
137 upon NMT inhibition, as the peptide levels reduced below the detection limit in two of three replicates,  
138 suggesting L1 is an NMT substrate with particularly high sensitivity to inhibition of NMT activity (Figure

139 2B). Moreover, YnMyr enrichment of A16 and G9 reduces most significantly upon NMT inhibition  
140 compared to other VACV proteins (Figure 2B and Supplementary Figure 1), suggesting this is specifically  
141 due to a loss of *N*-myristoylation. The observed reduction of *N*-myristoylation supports the hypothesis  
142 that VACV proteins require host NMTs, as there is no evidence of a VACV-encoded NMT. Target  
143 engagement of IMP-1088 towards the host NMTs, in the absence of VACV infection, was validated by  
144 the identification and significant depletion of YnMyr-dependent enrichment of 32 known co-  
145 translationally *N*-myristoylated substrates (Supplementary Figure 2). Next, we investigated the effect of  
146 VACV infection on the levels of proteins metabolically tagged with YnMyr, both in terms of known co-  
147 translationally and post-translationally *N*-myristoylated NMT substrates. As shown in Figure 2C, VACV  
148 infection reduces the levels of a majority of the 32 known co-translational *N*-myristoylated proteins that  
149 were identified by chemical proteomics. Similar reductions are seen with 27 known post-translational *N*-  
150 myristoylated proteins (Supplementary Figure 3). This observation corresponds with earlier findings that  
151 VACV infection reduces the synthesis of host proteins, in favor of proteins required for progressing the  
152 VACV life cycle, and thereby also likely affecting the flux of NMT substrates [23, 24].

153

154 **Host NMT inhibition does not affect VACV gene expression and morphogenesis.** The impact of host  
155 NMT inhibition by IMP-1088 was analyzed at different steps in the VACV life cycle. The effect of IMP-  
156 1088 on gene expression or DNA replication was tested using VACV WR expressing luciferase under an  
157 early/late and late promoter, respectively (Figure 3A). We found no significant difference in early protein  
158 synthesis at 2 hours post infection (hpi) between cells infected in the presence or absence of IMP-1088  
159 (Figure 3B). At 24 hpi, the presence of IMP-1088 also caused no observable change in late protein  
160 synthesis, suggesting that IMP-1088 did not impact VACV DNA replication (Figure 3C). Late protein  
161 expression requires VACV DNA replication as demonstrated by inhibition with the DNA replication  
162 inhibitor AraC (Figure 3C). Additionally, we observed multiple morphological forms of virus that are  
163 generated during infection, namely crescent (C), immature virus (IV), mature virus (MV), wrapped virus  
164 (WV) and enveloped virus (EV), in both untreated and IMP-1088 treated cells via electron microscopy  
165 (Figure 3D), demonstrating no qualitative effect on VACV morphogenesis and virion formation.

166

167 **Host NMT inhibition decreases infectivity of progeny VACV particles.** Given the lack of an apparent  
168 effect of IMP-1088 on viral replication, membrane wrapping or assembly, we queried whether virions  
169 generated in the presence of IMP-1088 were non-infectious. The yield of MV purified from VACV infected

170 cells treated with IMP-1088 (Figure 4A, lanes 2 and 4) was around 2-fold lower than that of control  
171 untreated cells as determined by protein staining (Figure 4A, lanes 3 and 5). When similar amounts of  
172 MV purified in the absence and presence of IMP-1088 were subjected to DNA isolation and tested for  
173 encapsidated genomic DNA by quantitative PCR (qPCR), similar Ct values were obtained at multiple  
174 dilutions (Figure 4B). Based on the qPCR results, equivalent numbers of viral particles from control and  
175 IMP-1088 treated cells were tested for infectious virus yield by plaque assay (measured in plaque  
176 forming units, pfu). Compared to untreated cells, MV purified from IMP-1088 treated cells exhibited a  
177 nearly 4-log reduction in infectivity (Figure 4C). This very high particle to pfu ratio was characteristic of  
178 virions with an entry-deficient phenotype.

179

180 **Host NMT inhibition reduces EV infectivity without affecting yield.** During VACV infection, a large  
181 majority of virus particles generated are of the MV type, a small proportion (1-10%) of which undergo  
182 an additional double-membrane wrapping step to form EV particles. We queried whether treatment of  
183 virus with IMP-1088 affected EV yield. The VACV strain IHD-J was used instead of WR because of the  
184 higher number of EV particles released. EV particles released in the cell culture medium were collected  
185 to measure viral yield and to quantitate the number of viral particles as depicted in Figure 5A. Since entry  
186 of EV into cells is dependent on the EFC, we anticipated that EVs produced in the presence of IMP-1088  
187 would have low or no infectivity. Indeed, infectious virus yield in the presence of IMP-1088 was lower  
188 than that of ST-246 treated cells (an inhibitor of EV formation), with values similar to AraC, which  
189 prevents genome replication (Figure 5B). In the absence of infectivity, we quantified the number of  
190 secreted EV particles by qPCR following DNA isolation. Only a slight reduction in viral genomic DNA  
191 content was observed with IMP-1088 treatment compared to untreated virus (Figure 5C). However, the  
192 reduction in Ct values was much more pronounced with AraC or with ST-246. Taken together, these data  
193 demonstrate that IMP-1088 reduces the infectivity of both MVs and EVs without significantly impacting  
194 virus particle formation and egress.

195

196 **Decrease in VACV infectivity under host NMT inhibition is linked to a defect in viral entry.** To measure  
197 the impact of IMP-1088 on virus entry, cells were infected with VACV WR-pE/L-LUC virus purified from  
198 cells with or without IMP-1088 treatment for 2 h and the level of early gene expression was determined  
199 by luciferase assay. The results demonstrated a statistically significant ( $p < 0.0005$ ) difference in luciferase  
200 levels between the virus purified from untreated versus IMP-1088 treated cells, with the latter largely



201 remaining below the limit of detection (Figure 6A). The data are consistent with a delay in the release of  
202 viral cores into the cytoplasm of cells, which is required to trigger early gene expression. We also  
203 examined membrane fusion by infecting cells labeled with a lipophilic dye, DiO and determined dye  
204 transfer by flow cytometry. Although not statistically significant, there was an observable reduction in  
205 the frequency of DiO<sup>+</sup> cells incubated with virus purified from IMP-1088 treated cells compared to the  
206 untreated control, indicating reduction in VACV hemifusion with the host cell membrane (Figure 6B).  
207 Laliberte et al (2011) found that the absence of L1 from mature virus particles had no effect on  
208 hemifusion but inhibited the next step of pore formation and core entry into the cytoplasm. In contrast  
209 several other EFC proteins including A16 and G9 are required for hemifusion. Foo *et al* have previously  
210 demonstrated the importance of L1 *N*-myristoylation for complementation of VACV infectivity but did  
211 not analyze the entry step [22]. Given that IMP-1088 treatment significantly inhibited L1 *N*-  
212 myristoylation by LC-MS/MS proteomics (Figure 2B) western blotting of YnMyr-labeled proteins with an  
213 L1 specific antibody was performed to confirm inhibition of L1 *N*-myristoylation. While L1 was pulled  
214 down after labeling with YnMyr in untreated cells, there was no detectable L1 pulldown in the presence  
215 of IMP-1088 (Figure 6C), providing a direct link between loss of L1 modification and reduction in virus  
216 entry.

217

218 **Viruses with G2A mutations of A16 and G9 retain infectivity.** The VACV G9 and A16 proteins are  
219 essential components of the EFC that have homologs encoded by all poxviruses [25, 26]. Notably, the  
220 N-terminal MG *N*-myristoylation motif is conserved in all poxviral G9 and A16 proteins, implying an  
221 important role in poxvirus biology. Previous and present biochemical studies show that VACV A16 and  
222 G9 are *N*-myristoylated, reinforcing the idea that this modification occurs throughout the poxvirus  
223 family. As IMP-1088 reduced *N*-myristoylation of G9 and A16, this effect could contribute to the  
224 inhibition of virus entry and infectivity. To investigate this possibility, mutant viruses VACV WR-A16(G2A)  
225 and VACV WR-G9(G2A) were constructed. Contrary to our expectation, the mutants remained fully  
226 infectious as shown by their relatively unchanged genome/PFU ratios compared to the parental virus  
227 (Figure 7A). The mean size of plaques formed by VACV WR-A16(G2A) were considerably smaller and  
228 those of VACV WR-G9(G2A) slightly smaller compared to the parental VACV WR, suggesting diminished  
229 virus spread (Figure 7B). Further studies are needed to determine the nature of this effect.

230

231



232 **DISCUSSION**

233 Lipidation of VACV-encoded proteins, either with myristic acid or palmitic acid, can be essential for virus  
234 infection. A Glycine to Alanine mutation in the N-terminal MG *N*-myristoylation motif of L1 renders VACV  
235 deficient in entry [22, 27]. Previous studies putatively identified 6 *N*-myristoylated VACV proteins using  
236 radiolabeled analogs [28]. Analysis of VACV encoded proteins by bioinformatics identified 11 proteins  
237 with a potential *N*-myristoylation motif (“MG”, at the N-terminus), including the previously confirmed  
238 proteins. Five of these were predicted to contain a *N*-myristoylation motif using the program  
239 Myristoylator based on additional consensus sequences at the N-terminus [29]. In this study, we used a  
240 combined approach of quantitative proteomics and molecular biology to evaluate the impact of a human  
241 NMT inhibitor, IMP-1088, on host and VACV protein *N*-myristoylation and viral infection.

242  
243 IMP-1088 inhibited VACV infection with an EC<sub>50</sub> concentration of 0.1 μM without detectable cytotoxicity  
244 up to 10 μM, at which concentration IMP-1088 is known to entirely inhibit NMT activity in human cells  
245 [18]. To determine the NMT protein substrates most strongly impacted by IMP-1088, cells were  
246 metabolically labeled with myristic acid analog YnMyr followed by bio-orthogonal ligation, enrichment  
247 and quantitative proteomic analysis. Three proteins, namely L1, G9 and A16, were detected. *N*-  
248 myristoylation of VACV encoded protein L1 was the most strongly inhibited among all substrates  
249 identified in the presence of IMP-1088. Using <sup>3</sup>H-myristic acid, 4 proteins, L1, A16, G9 and E7 were  
250 previously identified as *N*-myristoylated proteins bearing an optimal sequence motif, MGxxxS/T/A/C/N  
251 based on bioinformatic analysis [30]. Whilst 11 VACV proteins bear an N-terminal MG motif by sequence  
252 analysis, we reliably detected only L1, A16 and G9 by proteomics. Previous mass spectrometric studies  
253 of purified viral particles identified the *N*-myristoylation mark in L1 and E7 but not in A16 and G9 likely  
254 because of their low abundance [31]. In addition, significant differences in co-translational and post-  
255 translational *N*-myristoylation of host proteins was observed, with a reduction in *N*-myristoylation of  
256 host proteins detected after VACV infection compared to uninfected controls. An important caveat is  
257 that YnMyr was added after VACV infection, and therefore the changes observed in *N*-myristoylated  
258 VACV proteins are limited to newly translated proteins. The generalized shut down of host protein  
259 synthesis, which occurs following VACV infection [23], rather than a decrease in *N*-myristoyl transferase  
260 activity may account for the observed reduction in labeled host proteins.

261

262 Immediately following VACV entry and the release of viral cores into the cytoplasm, early mRNAs are  
263 transcribed and translated. After early gene expression, uncoating of viral cores releases encapsidated  
264 DNA which leads to DNA replication and the expression of intermediate and late genes [32]. IMP-1088  
265 potently decreased VACV infection and spread, however it did not significantly affect viral early or late  
266 protein synthesis suggesting no effect on DNA replication and gene expression. By electron microscopy,  
267 the progression of VACV morphogenesis from crescent to extracellular virus was observed in the  
268 presence of IMP-1088 indicating that virus formation was not abrogated. However, purified viral  
269 particles generated in the presence of IMP-1088 were found to be less infectious than virus from  
270 untreated infected cells, and exhibited reduced membrane fusion and core release in the cytoplasm.  
271 This overall phenotype is characteristic of entry-deficient viruses that lack functional entry/fusion  
272 complex (EFC) proteins, including L1 [33]. Our mass spectrometry analyses revealed L1 as the VACV  
273 protein with the most significant change in *N*-myristoylation in the presence of IMP-1088. Additionally,  
274 the absence of L1 in YnMyr pull down fractions comparing IMP-1088 treated and untreated cells  
275 demonstrated a defect in YnMyr incorporation by L1 in the presence of IMP-1088. Nevertheless, YnMyr  
276 incorporation into two additional *N*-myristoylated EFC proteins, A16 and G9, was also inhibited by IMP-  
277 1088. To investigate the role of *N*-myristoylation of these proteins, we constructed mutants with G2A  
278 mutations in the essential MG motif. The A16 G2A and G9-G2A mutants retained infectivity although the  
279 size of plaques formed by VACV with the A16 G2A mutation were smaller than those of the parental  
280 virus. Based on the retained infectivity of A16 and G9 mutant viruses in our study, and the previous  
281 report showing the lack of complementation of L1 G2A mutant gene [22], L1 appears to play the most  
282 critical role in the IMP-1088 mediated inhibition of VACV infection. Exactly how *N*-myristoylation of L1  
283 enables virus entry is not known, though it has been shown that this modification is necessary for  
284 formation of intramolecular disulfide bonds in L1 [22, 33].

285

286 Due to the importance of L1 for virus entry, it is targeted for antibody mediated neutralization and  
287 protein subunit-based vaccines against VACV [34-36]. Recently, two independent monoclonal antibody  
288 cocktails containing an anti-L1 VACV neutralizing antibody conferred protection *in vivo* against VACV and  
289 monkeypox virus when given prophylactically, further emphasizing its indispensable role in poxviral  
290 pathogenesis [37, 38]. However, anti-L1 mAb cannot neutralize EV particles, and protection against OPXV  
291 infection *in vivo* requires combination with mAbs that target EV proteins[39]. Even though the EV  
292 membrane dissociates prior to entry to expose the MV membrane, epitopes recognized by anti-L1

293 antibodies may remain inaccessible due to protection from ruptured membranes or spatial separation  
294 of fusion activity [40-43]. In our study, we demonstrate that the NMT inhibitor IMP-1088 potently  
295 inhibits both MV and EV particles by preventing *N*-myristoylation of L1. Given the high genetic identity  
296 between VACV and VARV L1 homologs (99.2%), additional studies that evaluate the *in vivo* efficacy of  
297 IMP-1088 against VACV as well as its *in vitro* potential against VARV are warranted. As IMP-1088 targets  
298 a different step in the OPXV life cycle than tecovirimat (TPOXX<sup>®</sup>, EV formation) and brincidofovir  
299 (TEMEXA<sup>®</sup>, DNA replication), the two FDA approved therapeutics [44, 45], the possibility of synergistic  
300 effects of combination therapy with both compounds may also warrant further investigation.

301

302

303

304

305

306

307

308

309

310

311 **MATERIALS AND METHODS**

312

313 **Viruses and cell lines.** The viruses used in this study have been previously described and include VACV  
314 WR-GFP [46], VACV WR-A4FP [47], VACV WR-pE/L-LUC [48], VACV WR-pF17R-LUC [49] and VACV IHDJ.  
315 VACV WR-G9(G2A) and VACV WR-A16(G2A) were constructed by homologous recombination and  
316 contain an adjacent GFP or dsRed gene, respectively, regulated by the VACV P11 promoter, which was  
317 used for selection as previously described [25, 26]. The codon changes in the mutated genes were  
318 confirmed by Sanger sequencing. Virus stocks were grown in BS-C-40 or BS-C-1 cells with DMEM  
319 containing 2% (v/v) fetal bovine serum (FBS) and stored at -80 °C prior to use. BS-C-40, BS-C-1 and HeLa  
320 cell lines were passaged in DMEM with 10% (v/v) FBS and 10 units/mL of penicillin and 100 µg/mL of  
321 streptomycin. For all experiments involving viral infection, DMEM containing 2% (v/v) FBS was used as a  
322 diluent or culture media.

323

324 **Virus yield quantification.** To quantify total virus yield, HeLa cells were infected with VACV in the  
325 presence or absence of IMP-1088 for 24 h at 37 °C. The following day, cells and supernatants were  
326 collected and frozen at -80 °C. The samples were serially diluted and titrated by plaque assay using BSC40  
327 cells (described below). To specifically quantify EV yield, only the supernatants of infected cells were  
328 collected, and subsequently titrated by plaque assay (described below).

329

330 **Plaque assay.** BSC40 cells were infected with serially diluted VACV-containing samples for 1 h at room  
331 temperature (RT). The infected cells were washed three times to remove unbound virus. Each dilution  
332 was tested in triplicate. An overlay containing 2% (w/v) methylcellulose was added to each well, and  
333 plates were incubated at 37 °C for 72 h. Monolayers were then fixed and stained using crystal violet stain  
334 containing 10% (v/v) formalin. Plaques were counted and used to determine viral titer in the presence  
335 or absence of treatments. Areas of individual plaques formed in BS-C-1 cells and stained with crystal  
336 violet were determined using an EVOS cell imaging system (Thermo Fisher Scientific).

337

338 **Viral spread assay.** The viral spread assay was performed as previously described [50]. Briefly, IMP-1088  
339 was serially diluted and mixed with VACV-WR-GFP virus diluted in DMEM-2. The mixture was used to  
340 infect HeLa cells seeded in 96-well plates (Corning, 06-443-2) at 37 °C for 24 h. A cytosine arabinoside  
341 (AraC; 40 µg/mL) treatment and other controls were included on each plate, and the IMP-1088 dilution

342 series was tested in duplicate. After 24 h, the cells were fixed with 4% (w/v) paraformaldehyde for  
343 15 min at RT and stained with 4',6-diamidino-2-phenylindole (DAPI) for nuclei visualization for 10 min at  
344 RT. The plates were imaged using the ArrayScan XTI High Content Screen (HCS) reader, and the  
345 percentage of GFP and DAPI positive cells was quantified using the HCS Studio Cell Analysis software as  
346 previously described [51]. Raw data was analyzed using GraphPad Prism software (GraphPad Software,  
347 v7) to determine the concentrations required for 50% inhibition ( $EC_{50}$ ) of viral spread relative to the no  
348 treatment control.

349

350 **LDH Cytotoxicity Assay.** The LDH Cytotoxicity Assay was performed using the LDH Cytotoxicity Assay kit  
351 (Thermo Scientific Pierce, 88953) as per the manufacturer's instructions. Serially diluted compound (10-  
352 0.62  $\mu$ M) was added to HeLa cells and incubated at 37 °C for 24 hrs. Supernatants were collected and  
353 the levels of extracellular lactate dehydrogenase (LDH) expressed in the supernatants were quantified.  
354 Data was analyzed using GraphPad Prism software (GraphPad Software, v7).

355

356 **Early/Late protein and Late protein synthesis.** BSC40 cells were infected with either a VACV WR-pE/L-  
357 LUC which expresses luciferase by a synthetic early/late gene promoter or with VACV WR-pF17R-LUC,  
358 which expresses luciferase under a F17R gene late promoter. Cells were infected with virus at MOI 3 for  
359 1 h at RT. After infection, cells were washed three times with 1X PBS to remove unbound virus. IMP-  
360 1088 diluted to 10  $\mu$ M was added to cells and incubated at 37 °C for either 2 h or 24 h to quantitate  
361 early/late or late protein synthesis respectively. Cells were lysed with Reporter Lysis Buffer, subjected to  
362 a freeze-thaw cycle to lyse cells and luciferase activity was measured using the Luciferase Assay System  
363 (Promega, Madison, WI) according to manufacturer's instructions. Luciferase activity was measured  
364 using an ENSPIRE plate reader (PerkinElmer, Waltham, MA, United States).

365

366 **Electron Microscopy.** BS-C-40 cells were infected with VACV IHDJ in the presence or absence of 2  $\mu$ M  
367 IMP-1088 for 24 h at 37 °C. Following infection, cell monolayers were gently scraped, pelleted, and  
368 processed for thin-section electron microscopy (EM). Specimens were fixed in buffered 2.5% (w/v)  
369 glutaraldehyde, fixed in 1% (w/v) osmium tetroxide, stained *en bloc* with 4% (w/v) uranyl acetate,  
370 dehydrated through a graded alcohol and acetone series, and embedded in a mixture of Epon substitute  
371 and Araldite epoxy resins. Thin sections were stained with 4% (w/v) uranyl acetate and Reynolds' lead  
372 citrate [52].

373

374 **Purification and specific infectivity of VACV.** BSC-40 cells were infected with VACV WR-pE/L-LUC virus  
375 in the presence or absence of 2  $\mu$ M IMP-1088 for 24 h at 37 °C. The cells were harvested, and viruses  
376 were purified using a sucrose cushion followed by sucrose gradient centrifugation and resuspended in  
377 equal volumes. Purified virus stocks were frozen at -80 °C until use. To assess the relative number of  
378 viral particles present in the untreated and IMP-1088-treated stocks, we measured viral protein content  
379 and the quantity of genomic viral DNA using SDS-PAGE followed by Coomassie staining and Real-time  
380 PCR, respectively. Thereafter, the viruses were titrated by plaque assay to determine infectious virus  
381 yield or plaque forming unit (pfu) of untreated and IMP-1088-treated stocks.

382

383 **Quantitative PCR.** Viral DNA samples were tested with a quantitative orthopoxvirus generic PCR assay  
384 based on TaqMan<sup>®</sup> chemistry and technology described elsewhere [53]. Each 20  $\mu$ L reaction contained  
385 6.5  $\mu$ L of RNase/DNase free water (Clontech, Mountainview, CA), 10  $\mu$ L of TaqMan<sup>®</sup> Fast Advanced  
386 Master Mix (Life Technologies, Grand Island, NY), 0.5  $\mu$ L each of forward and reverse primer at 50  $\mu$ M  
387 and 0.5  $\mu$ L of probe at 10  $\mu$ M, to which 5  $\mu$ L of DNA were added. Cycling parameters for the real-time  
388 PCR were 95 °C for 20 s, followed by 40 cycles of 95 °C for 3 s and 60 °C for 30 s performed on a 7500  
389 Fast Dx Real-Time PCR Instrument (Life Technologies, Grand Island, NY).

390

391 **Genome/PFU ratios.** VACV mature virions were purified from infected cell homogenates by  
392 sedimentation through a sucrose cushion, and Infectivity was determined by plaque assay. The purified  
393 virions were treated with Benzonase (Sigma, ST. Louis) to remove adventitious DNA after which genomic  
394 DNA was extracted and quantified by digital droplet PCR as described [54].

395

396 **Virus entry assay.** BSC40 cells were infected, for 2 h at 37 °C, with serially diluted VACV WR-pE/L-LUC  
397 virus grown in the presence of IMP-1088 or DMSO. The cells were subsequently lysed using the Reporter  
398 Lysis Buffer and freeze-thawed once, and luciferase activity was measured using the Luciferase Assay  
399 System according to manufacturer's instructions. Luciferase activity was measured using an ENSPIRE  
400 plate reader.

401

402 **Viral fusion assay.** To evaluate membrane fusion of VACV virus, both viruses were labeled with lipophilic  
403 tracer DiO as previously described [55]. Briefly, purified untreated VACV-WR and IMP-1088-treated

404 VACV-WR were incubated with DiO diluted in 1X PBS (Thermofisher) in the dark for 20 min at RT. The  
405 viruses were subsequently washed and pelleted three times to remove unbound DiO. BSC40 cells were  
406 incubated with each of the DiO-labeled viruses for 1 h at RT to bind, and then washed three times with  
407 1X PBS to remove unbound virus. The virus + cell mixture was then incubated at 37 °C for 90 min to allow  
408 membrane fusion. Following fusion, the samples were fixed with 4% (w/v) paraformaldehyde for 15 min  
409 and then analyzed by flow cytometry using the Attune Nxt instrument to determine percent DiO<sup>+</sup> cells.

410

411 **Metabolic tagging and chemical proteomics to identify *N*-myristoylated proteins.** In triplicate, HeLa  
412 cells were grown in T75 flasks to 80-90% confluency, followed by infection with VACV-Luc as well as a  
413 metabolic tagging pulse of 20 μM tetradec-13-ynoic acid (YnMyr) for 24 h, in the presence or absence of  
414 2 μM IMP-1088. In parallel, HeLa cells were treated identically but in absence of VACV infection, as  
415 uninfected controls. Then, the cells were washed with PBS and lysed by scraping in lysis buffer (1% (v/v)  
416 Triton X-100, 0.1% (w/v) SDS and EDTA-free protease inhibitor cocktail (Roche, 11873580001) in PBS,  
417 pH 7.4). Proteins were precipitated (methanol:chloroform:water at 4:1:2), the pellet washed with cold  
418 methanol and resuspended in 1% (v/v) Triton X-100, 0.1% (w/v) SDS and EDTA-free protease inhibitor  
419 cocktail (Roche, 11873580001) in PBS, pH 7.4. Protein concentrations were determined (BCA assay kit,  
420 Thermo Fisher 23250). Lysates (300 μg total protein) were incubated with premixed copper-catalyzed  
421 cycloaddition (CuAAC) ligation reagents (100 μM AzRB, 1 mM CuSO<sub>4</sub>, 1 mM TCEP (Sigma C4706), and  
422 100 μM TBTA (Sigma 678937)) while vortexing for 1 h at RT. After quenching with 10 mM EDTA, proteins  
423 were precipitated (methanol:chloroform:water at 4:1:2), the pellet washed with cold methanol and  
424 resuspended in 0.2% (w/v) SDS in 50 mM HEPES (Sigma 54457), pH 8.0. After enrichment on  
425 NeutrAvidin-coupled agarose beads and stringent detergent washing, enriched proteins were digested  
426 on-bead with trypsin (Promega, V5111). Peptides were acidified with 0.5% (v/v) TFA (Sigma T6508),  
427 desalted on Stage Tips, and analysed by Label Free Quantification by nanoLC-MS/MS on a Thermo  
428 QExactive instrument as described previously [12, 19]. The proteomic analysis data was processed using  
429 MaxQuant v1.6.4.0 with built-in Andromeda search engine [56]. Peptides were identified from the  
430 MS/MS spectra by searching against the human (UP000005640) and the VACV virus (UP000000344)  
431 FASTA proteome references with both canonical and isoforms. Cysteine carbamidomethylation was set  
432 as a fixed modification and methionine oxidation, N-terminal acetylation and YnMyr-AzRB2 as variable  
433 modifications. 'Trypsin/P' was the digestion mode enzyme, and up to two missed cleavages were  
434 allowed. The 'match between run' option was selected, along with 'unique and razor peptides' for



435 protein quantification. Processed data were further analyzed using Perseus v1.6.2.3, RStudio 1.4.1106  
436 (R version 4.0.4) and GraphPad Prism v8.0. Prerequisite for statistical significance testing was a minimum  
437 of two identifications per triplicate. To determine statistical significance within Volcano plots, 250  
438 randomized, two-sided Student t-tests were performed with false discovery rate (FDR) set to 0.05 and  
439 50 to 0.1, and a minimum of 2 unique peptides per protein were required.

440

441 Lysates (300 µg total protein) were incubated with premixed copper-catalyzed cycloaddition (CuAAC)  
442 ligation reagents (100 µM AzRB, 1 mM CuSO<sub>4</sub>, 1 mM TCEP (Sigma C4706), and 100 µM TBTA (Sigma  
443 678937)) while vortexing for 1 h at RT. After quenching with 10 mM EDTA, proteins were precipitated  
444 (methanol:chloroform:water at 4:1:2), the pellet washed with cold methanol and resuspended in  
445 0.2% (w/v) SDS in 50 mM HEPES (Sigma 54457), pH 8.0. After enrichment on NeutrAvidin-coupled  
446 agarose beads and stringent detergent washing,

447

448 **Validation of *N*-myristoylation of VACV L1 protein.** Samples were prepared as described in previous  
449 section [11]. Briefly, 50 µg proteins were incubated with premixed CuAAC ligation reagents [100 µM  
450 AzRB, 1 mM CuSO<sub>4</sub>, 1 mM TCEP (Sigma C4706), and 100 µM TBTA (Sigma 678937)] and vortexed for 1 h  
451 at RT. After quenching with 5 mM EDTA, proteins were precipitated (methanol:chloroform:water at  
452 4:1:2), the pellet washed with cold methanol and resuspended in in PBS containing 2% (w/v) SDS and  
453 10 mM DTT. Samples were centrifuged at 17,000 g for 10 min and an aliquot was set aside as the “input”  
454 sample. The remaining volume was submitted for biotin-enrichment on magnetic Streptavidin beads  
455 (NEB S1420S), by vortexing for 90 min at RT. The mixture was separated by placing the tube on a Magna  
456 GriP rack magnet (Sigma, 20-400) for 2 min, allowing collection of the supernatant, and stringent  
457 detergent washing of the beads. The beads were finally boiled in Laemmli sample buffer (10% (w/v) SDS,  
458 25% (v/v) β-mercaptoethanol and 0.02% (w/v) bromophenol blue in 50% (v/v) glycerol in 1 M Tris-HCl,  
459 pH 6.8) for 10 min at 95 °C. Input and supernatant samples were boiled at 95 °C for 5 min. To detect L1  
460 protein, samples were loaded and run on a 12% (w/v) SDS-PAGE gel, transferred onto a nitrocellulose  
461 membrane by blotting and incubated for 1 h with 5% (w/v) non-fat milk in PBS supplemented with  
462 0.1% (v/v) Tween20. The membrane was incubated with an anti-L1 antibody (R180) [22] overnight and  
463 with a secondary rabbit antibody IRDye 800CW (Li-Cor 926-32211) for 1 h. The blots were imaged using  
464 the Odyssey CLx (LI-COR Biosciences).

465

467 **ACKNOWLEDGEMENTS**

468 The study was supported by the CDC Intramural Research and Biomedical Advanced Research and  
469 Developmental Authority (BARDA) and an ORISE Postdoctoral Fellowship (LP). The European  
470 Commission (Marie Skłodowska Curie Individual Fellowship grant 752165 to WWK), EPSRC (Impact  
471 Acceleration Account grant PS1042 to WWK and EWT), Cancer Research UK (C29637/A21451 and  
472 C29637/A20183 to E.W.T.). Work in the E.W.T. laboratories is supported by the Francis Crick Institute,  
473 which receives its core funding from Cancer Research UK (FC001057 and FC001097), the UK Medical  
474 Research Council (FC001057 and FC001097), and the Wellcome Trust (FC001057 and FC001097). Partial  
475 support was provided by the Division of Intramural Research, NIAID. The findings and conclusions in this  
476 report are those of the authors and do not necessarily represent the official position of the Centers for  
477 Disease Control and Prevention.

478 **AUTHOR CONTRIBUTIONS**

479 LP and WWK contributed to the design of the viral and proteomic studies, performed experiments,  
480 analyzed data and co-wrote the manuscript.

481 MF, KW, CSG, CAC, SO performed experiments and analyzed data.

482 RS and BM contributed to the design of the studies and review of the data.

483 EWT contributed to direction and design of the proteomic studies, co-wrote the manuscript and co-led  
484 the study.

485 SP contributed to direction and design of the viral studies, co-wrote the manuscript and co-led the study.

486

487 **DECLARATION OF INTERESTS**

488 RS is CEO of Myricx Pharma Ltd.

489 EWT is a founder and Director of Myricx Pharma Ltd.

490

491 **FIGURE LEGENDS**

492 **Figure 1. IMP-1088 inhibits VACV spread and virus yield. (A) Step-wise illustration of virus yield, spread**  
493 **and cytotoxicity assays. (B)** Quantification of VACV yield in the presence of IMP-1088. HeLa cells were  
494 infected with VACV WR at increasing concentrations of IMP-1088. The cells were harvested 24 hpi, lysed  
495 by freeze-thaw and virus yield was determined by plaque assay. Dotted line indicates 50% virus yield. (C)  
496 Measuring viral spread in the presence of IMP-1088 based on GFP expression. Cells were infected with  
497 VACV WR-GFP in the presence of different concentrations of IMP-1088. The concentration of IMP-1088  
498 required to reduce viral spread by 50% ( $EC_{50}$ ) was determined. (D) Cytotoxic effects of IMP-1088  
499 determined by LDH assay. The concentration of IMP-1088 required for 50% of maximum OD (LDH signal  
500 in the absence of inhibitor) was measured and is reported as CC50. All experiments were performed  
501 twice with two replicates in each experiment. Values represent means +/- SEM.

502

503 **Figure 2. Chemical proteomic identification and quantification of host and viral proteins after VACV**  
504 **infection, enrichment, and mass spectrometric detection. (A)** Identification of VACV proteins after  
505 YnMyr enrichment. Left vertical line depicts  $-0.5 \text{ Log}_2$  fold change, right of  $+0.5$ ; horizontal line depicts  
506 significance cut-off ( $P = 0.05$ ); 3 *N*-myristoylated VACV proteins depicted in purple, 115 VACV proteins in  
507 pink, 2738 human proteins in gray. (B) Label free quantification intensity of *N*-myristoylated VACV  
508 proteins L1, A16, G9, as determined in background, after metabolic tagging with YnMyr and after NMT  
509 inhibition with IMP-1088. Average of 3 replicates, error bars depict standard deviation, significance  
510 tested by ANOVA. (C) Effect of VACV infection on 32 known co-translationally *N*-myristoylated protein  
511 levels of the host (purple). Left vertical line depicts  $-0.5 \text{ Log}_2$  fold change, right of  $+0.5$ ; horizontal line  
512 depicts significance cut-off ( $P = 0.05$ ). Other proteins in gray.

513

514 **Figure 3. IMP-1088 does not affect VACV gene expression and morphogenesis. (A)** Schematic  
515 representation of early and late protein detection in the presence of  $2 \mu\text{M}$  IMP-1088. (B) BSC40 cells  
516 were infected with purified VACV WR-pE/L LUC virus in the absence and presence of  $2 \mu\text{M}$  IMP-1088 and  
517  $40 \mu\text{g}/\text{mL}$  AraC. The level of secreted luciferase from early promoter was determined at 2 hpi. (C) BSC40  
518 cells were infected with purified VACV WR-pF17R LUC in the absence and presence of  $2 \mu\text{M}$  IMP-1088  
519 and  $40 \mu\text{g}/\text{mL}$  AraC. Luciferase levels were measured 24 hpi. RLU values of virus control, IMP-1088 and  
520 AraC treatments in (B) and (C) were compared using a one-way ANOVA followed by a Tukey's multiple

521 comparisons test. Ns indicates no significant difference and \*\*\*\* signifies a  $p < 0.0001$ . (C) Transmission  
522 electron micrographs of VACV-infected cells in the absence and presence of IMP-1088. The various  
523 morphogenic forms of VACV are seen in both treatments; crescent (C), immature virus (IV), mature virus  
524 (MV), wrapped virus (WV) and extracellular virus (EV). Scale bar corresponds to 1  $\mu\text{m}$ .

525 **Figure 4. IMP-1088 decreases infectivity of progeny VACV particles.** (A) Coomassie stained SDS-PAGE  
526 gel showing difference in protein levels between IMP-1088-treated and untreated (control) viruses.  
527 BSC40 cells were infected with VACV WR pE/L-LUC for 24 h in the absence and presence of 2  $\mu\text{M}$  IMP-  
528 1088. Cells were harvested and lysed, and virus particles were purified by sucrose density gradient  
529 centrifugation. Either 7.5 or 15  $\mu\text{l}$  of purified virus was run in a 4-12% SDS PAGE and stained with  
530 Coomassie blue. (B) Equivalent viral particles based on Coomassie staining were subjected to DNA  
531 isolation followed by real time PCR using VACV-specific primers. Ct values at different dilutions of  
532 purified DNA from the two treatments are shown. (C) Equivalent viral particles from untreated and IMP-  
533 1088 treated virus were tested by plaque assay to determine virus yields. Yields plotted for both  
534 treatments as pfu/mL.

535

536 **Figure 5. IMP-1088 reduces EV infectivity without affecting yield.** (A) Schematic representation of  
537 assays used to assess VACV EV production after treatment with IMP-1088. (B) BSC40 cells were infected  
538 with VACV IHD-J in presence of inhibitors AraC, ST-246 and IMP-1088 for 24 h. The culture media was  
539 collected, spun at low speed to remove debris and cells, and tested by plaque assay to determine virus  
540 yield (pfu/mL). Three replicates were tested per viral dilution for each treatment, and the mean values  
541 +/- SD are shown. (C) Total viral DNA in the culture media for all four treatments was quantified by DNA  
542 isolation followed by qPCR. Four replicates per dilution were tested for every treatment, and the means  
543 +/- SD are shown. In both B and C, a one-way ANOVA was performed to determine statistical significance,  
544 followed by Tukey's multiple comparisons test. Ns= not significant, \*\* =  $p \leq 0.005$  and \*\*\*\*= $p < 0.0001$ .

545

546 **Figure 6. Decrease in VACV infectivity linked to defect in viral entry.** (A) IMP-1088 treated virus exhibits  
547 lower early gene expression compared to control virus. BSC40 cells were infected with VACV propagated  
548 in the absence or presence of 2  $\mu\text{M}$  IMP-1088, and luciferase levels were determined 2 hpi as a surrogate  
549 of early protein synthesis. Dotted line indicates level of detection. (B) Lower membrane fusion between

550 cells and IMP-1088 treated virus compared to control virus. Virus grown in the presence or absence of  
551 IMP-1088 was purified and labelled with fluorescent dye DiO (same virus as Figure 4). Cells were infected  
552 with DiO-labeled virus at RT (to determine background signal) and at 37°C. Transfer of fluorescent dye  
553 from viral membrane to cellular membrane was measured by flow cytometry. (C) Western blot to  
554 confirm pulldown of L1 protein after metabolic labelling with YnMyr, chemical modification and  
555 precipitation using streptavidin resin. The input, supernatant and eluted fractions from uninfected and  
556 infected cells in the presence and absence of IMP-1088 were tested for presence of L1 using anti-L1  
557 polyclonal antibody (R180).

558

559 **Figure 7. Genomes and infectivity of G9 and A16 viruses with G2A mutations.** (A) Ratios of genomes to  
560 infectious units. WR, VACV WR-G9(2GA), and VACV WR-A16(G2A) mature virions were purified from  
561 infected cells and the infectivity determined by plaque assay. DNA was extracted from the purified  
562 virions and genome copies were quantified by ddPCR. (B) Plaque sizes. The areas of plaques formed by  
563 purified VACV WR, VACV WR-G9(G2A) and VACV WR-A16(G2A) from a representative experiment are  
564 shown. The areas of WR-A16(G2A) plaques were smaller than VACV WR in each of three independent  
565 experiments and those of WR-G9(G2A) were similar to those of VACV WR in one experiment and slightly  
566 smaller in two others.

567

568

569 Supplementary data:

570 **Supplementary Table 1. N-myristoylated proteins present in VACV proteome.** Validated *N*-  
571 myristoylated proteins A16, G2 and L1 shown in red, and potentially *N*-myristoylated proteins shown in  
572 black.

573

574 **Supplementary Figure 1. Chemical proteomic identification of N-myristoylated VACV proteins.** Target  
575 engagement of NMT inhibitor (NMTi = IMP-1088) on VACV proteins in infected host cells. Left vertical  
576 line depicts -0.5 Log<sub>2</sub> fold change, right of +0.5; horizontal line depicts significance cut-off (P = 0.05); 3  
577 *N*-myristoylated VACV proteins depicted in purple, 115 VACV proteins in pink, 2738 human proteins in  
578 gray.



579

580 **Supplementary Figure 2. Target engagement of NMTi on co-translationally *N*-myristoylated host**  
581 **proteins.** Target engagement of NMT inhibitor (NMTi = IMP-1088) in host cells, as visualized by the effect  
582 on 32 known co-translationally *N*-myristoylated proteins of the host (purple). Left vertical line depicts -  
583 0.5 Log<sub>2</sub> fold change, right of +0.5; horizontal line depicts significance cut-off (P = 0.05). Other proteins  
584 in gray.

585

586 **Supplementary Figure 3. VACV reduces abundance post-translationally *N*-myristoylated proteins of**  
587 **host.** Effect of VACV infection on 27 known post-translationally *N*-myristoylated protein levels of the  
588 host (purple). Left vertical line depicts -0.5 Log<sub>2</sub> fold change, right of +0.5; horizontal line depicts  
589 significance cut-off (P = 0.05). Other proteins in gray.

590

591

592

## 593 REFERENCES

- 594 1. Moss B. Smallpox vaccines: targets of protective immunity. *Immunol Rev.* 2011;239(1):8-26. Epub  
595 2011/01/05. doi: 10.1111/j.1600-065X.2010.00975.x. PubMed PMID: 21198662; PubMed Central PMCID:  
596 PMCPMC3074351.
- 597 2. Meyer H, Ehmann R, Smith GL. Smallpox in the Post-Eradication Era. *Viruses.* 2020;12(2). Epub  
598 2020/01/30. doi: 10.3390/v12020138. PubMed PMID: 31991671; PubMed Central PMCID: PMCPMC7077202.
- 599 3. Farazi TA, Waksman G, Gordon JI. The biology and enzymology of protein N-myristoylation. *J Biol Chem.*  
600 2001;276(43):39501-4. Epub 2001/08/31. doi: 10.1074/jbc.R100042200. PubMed PMID: 11527981.
- 601 4. Wilcox C, Hu JS, Olson EN. Acylation of proteins with myristic acid occurs cotranslationally. *Science.*  
602 1987;238(4831):1275-8. Epub 1987/11/27. doi: 10.1126/science.3685978. PubMed PMID: 3685978.
- 603 5. Boutin JA. Myristoylation. *Cell Signal.* 1997;9(1):15-35. Epub 1997/01/01. doi: 10.1016/s0898-  
604 6568(96)00100-3. PubMed PMID: 9067626.
- 605 6. Giang DK, Cravatt BF. A second mammalian N-myristoyltransferase. *J Biol Chem.* 1998;273(12):6595-8.  
606 Epub 1998/04/18. doi: 10.1074/jbc.273.12.6595. PubMed PMID: 9506952.
- 607 7. Resh MD. Trafficking and signaling by fatty-acylated and prenylated proteins. *Nat Chem Biol.*  
608 2006;2(11):584-90. Epub 2006/10/20. doi: 10.1038/nchembio834. PubMed PMID: 17051234.
- 609 8. Wright MH, Heal WP, Mann DJ, Tate EW. Protein myristoylation in health and disease. *J Chem Biol.*  
610 2010;3(1):19-35. Epub 2009/11/10. doi: 10.1007/s12154-009-0032-8. PubMed PMID: 19898886; PubMed  
611 Central PMCID: PMCPMC2816741.
- 612 9. Resh MD. Fatty acylation of proteins: new insights into membrane targeting of myristoylated and  
613 palmitoylated proteins. *Biochim Biophys Acta.* 1999;1451(1):1-16. Epub 1999/08/14. doi: 10.1016/s0167-  
614 4889(99)00075-0. PubMed PMID: 10446384.
- 615 10. Tate EW, Kalesh KA, Lanyon-Hogg T, Storck EM, Thinon E. Global profiling of protein lipidation using  
616 chemical proteomic technologies. *Curr Opin Chem Biol.* 2015;24:48-57. Epub 2014/12/03. doi:  
617 10.1016/j.cbpa.2014.10.016. PubMed PMID: 25461723; PubMed Central PMCID: PMCPMC4319709.
- 618 11. Thinon E, Serwa RA, Broncel M, Brannigan JA, Brassat U, Wright MH, et al. Global profiling of co- and  
619 post-translationally N-myristoylated proteomes in human cells. *Nat Commun.* 2014;5:4919. Epub 2014/09/27.  
620 doi: 10.1038/ncomms5919. PubMed PMID: 25255805; PubMed Central PMCID: PMCPMC4200515.
- 621 12. Kallemeijn WW, Lanyon-Hogg T, Panyain N, Goya Grocin A, Ciepla P, Morales-Sanfrutos J, et al.  
622 Proteome-wide analysis of protein lipidation using chemical probes: in-gel fluorescence visualization,  
623 identification and quantification of N-myristoylation, N- and S-acylation, O-cholesterylation, S-farnesylation and  
624 S-geranylgeranylation. *Nat Protoc.* 2021;16(11):5083-122. Epub 2021/10/27. doi: 10.1038/s41596-021-00601-6.  
625 PubMed PMID: 34707257.
- 626 13. Maurer-Stroh S, Eisenhaber F. Myristoylation of viral and bacterial proteins. *Trends Microbiol.*  
627 2004;12(4):178-85. Epub 2004/03/31. doi: 10.1016/j.tim.2004.02.006. PubMed PMID: 15051068.
- 628 14. Goncalves V, Brannigan JA, Laporte A, Bell AS, Roberts SM, Wilkinson AJ, et al. Structure-guided  
629 optimization of quinoline inhibitors of Plasmodium N-myristoyltransferase. *Medchemcomm.* 2017;8(1):191-7.  
630 Epub 2017/06/20. doi: 10.1039/c6md00531d. PubMed PMID: 28626547; PubMed Central PMCID:  
631 PMCPMC5463734.
- 632 15. Wright MH, Paape D, Price HP, Smith DF, Tate EW. Global Profiling and Inhibition of Protein Lipidation in  
633 Vector and Host Stages of the Sleeping Sickness Parasite *Trypanosoma brucei*. *ACS Infect Dis.* 2016;2(6):427-41.  
634 Epub 2016/06/23. doi: 10.1021/acsinfecdis.6b00034. PubMed PMID: 27331140; PubMed Central PMCID:  
635 PMCPMC4906374.
- 636 16. Wright MH, Paape D, Storck EM, Serwa RA, Smith DF, Tate EW. Global analysis of protein N-  
637 myristoylation and exploration of N-myristoyltransferase as a drug target in the neglected human pathogen  
638 *Leishmania donovani*. *Chem Biol.* 2015;22(3):342-54. Epub 2015/03/03. doi: 10.1016/j.chembiol.2015.01.003.  
639 PubMed PMID: 25728269; PubMed Central PMCID: PMCPMC4372256.
- 640 17. Rackham MD, Yu Z, Brannigan JA, Heal WP, Paape D, Barker KV, et al. Discovery of high affinity inhibitors  
641 of *Leishmania donovani* N-myristoyltransferase. *Medchemcomm.* 2015;6(10):1761-6. Epub 2016/03/11. doi:  
642 10.1039/c5md00241a. PubMed PMID: 26962429; PubMed Central PMCID: PMCPMC4757855.

- 643 18. Kallemeijn WW, Lueg GA, Faronato M, Hadavizadeh K, Goya Grocin A, Song OR, et al. Validation and  
644 Invalidation of Chemical Probes for the Human N-myristoyltransferases. *Cell Chem Biol.* 2019;26(6):892-900 e4.  
645 Epub 2019/04/23. doi: 10.1016/j.chembiol.2019.03.006. PubMed PMID: 31006618; PubMed Central PMCID:  
646 PMCPMC6593224.
- 647 19. Mousnier A, Bell AS, Swieboda DP, Morales-Sanfrutos J, Perez-Dorado I, Brannigan JA, et al. Fragment-  
648 derived inhibitors of human N-myristoyltransferase block capsid assembly and replication of the common cold  
649 virus. *Nat Chem.* 2018;10(6):599-606. Epub 2018/05/16. doi: 10.1038/s41557-018-0039-2. PubMed PMID:  
650 29760414; PubMed Central PMCID: PMCPMC6015761.
- 651 20. Martin KH, Grosenbach DW, Franke CA, Hruby DE. Identification and analysis of three myristylated  
652 vaccinia virus late proteins. *J Virol.* 1997;71(7):5218-26. Epub 1997/07/01. PubMed PMID: 9188589; PubMed  
653 Central PMCID: PMCPMC191757.
- 654 21. Moss B. Poxvirus cell entry: how many proteins does it take? *Viruses.* 2012;4(5):688-707. Epub  
655 2012/07/04. doi: 10.3390/v4050688. PubMed PMID: 22754644; PubMed Central PMCID: PMCPMC3386626.
- 656 22. Foo CH, Whitbeck JC, Ponce-de-Leon M, Saw WT, Cohen GH, Eisenberg RJ. The myristate moiety and  
657 amino terminus of vaccinia virus I1 constitute a bipartite functional region needed for entry. *J Virol.*  
658 2012;86(10):5437-51. Epub 2012/03/09. doi: 10.1128/JVI.06703-11. PubMed PMID: 22398293; PubMed Central  
659 PMCID: PMCPMC3347306.
- 660 23. Yang Z, Bruno DP, Martens CA, Porcella SF, Moss B. Simultaneous high-resolution analysis of vaccinia  
661 virus and host cell transcriptomes by deep RNA sequencing. *Proc Natl Acad Sci U S A.* 2010;107(25):11513-8.  
662 Epub 2010/06/07. doi: 10.1073/pnas.1006594107. PubMed PMID: 20534518; PubMed Central PMCID:  
663 PMCPMC2895082.
- 664 24. Veyer DL, Carrara G, Maluquer de Motes C, Smith GL. Vaccinia virus evasion of regulated cell death.  
665 *Immunol Lett.* 2017;186:68-80. Epub 2017/03/31. doi: 10.1016/j.imlet.2017.03.015. PubMed PMID: 28366525.
- 666 25. Ojeda S, Domi A, Moss B. Vaccinia virus G9 protein is an essential component of the poxvirus entry-  
667 fusion complex. *J Virol.* 2006;80(19):9822-30. doi: 10.1128/JVI.00987-06. PubMed PMID: 16973586; PubMed  
668 Central PMCID: PMCPMC1617269.
- 669 26. Ojeda S, Senkevich TG, Moss B. Entry of vaccinia virus and cell-cell fusion require a highly conserved  
670 cysteine-rich membrane protein encoded by the A16L gene. *J Virol.* 2006;80(1):51-61. doi: 10.1128/JVI.80.1.51-  
671 61.2006. PubMed PMID: 16352530; PubMed Central PMCID: PMCPMC1317547.
- 672 27. Grosenbach DW, Hruby DE. Analysis of a vaccinia virus mutant expressing a nonpalmitoylated form of  
673 p37, a mediator of virion envelopment. *J Virol.* 1998;72(6):5108-20. Epub 1998/05/30. PubMed PMID: 9573282;  
674 PubMed Central PMCID: PMCPMC110078.
- 675 28. Grosenbach DW, Hruby DE. Biology of vaccinia virus acylproteins. *Front Biosci.* 1998;3:d354-64. Epub  
676 1998/03/21. doi: 10.2741/a280. PubMed PMID: 9506927.
- 677 29. Bologna G, Yvon C, Duvaud S, Veuthey AL. N-Terminal myristoylation predictions by ensembles of neural  
678 networks. *Proteomics.* 2004;4(6):1626-32. Epub 2004/06/03. doi: 10.1002/pmic.200300783. PubMed PMID:  
679 15174132.
- 680 30. Duronio RJ, Rudnick DA, Adams SP, Towler DA, Gordon JI. Analyzing the substrate specificity of  
681 *Saccharomyces cerevisiae* myristoyl-CoA:protein N-myristoyltransferase by co-expressing it with mammalian G  
682 protein alpha subunits in *Escherichia coli*. *J Biol Chem.* 1991;266(16):10498-504. Epub 1991/06/05. PubMed  
683 PMID: 1903791.
- 684 31. Ngo T, Mirzakhanyan Y, Moussatche N, Gershon PD. Protein Primary Structure of the Vaccinia Virion at  
685 Increased Resolution. *J Virol.* 2016;90(21):9905-19. Epub 2016/08/26. doi: 10.1128/JVI.01042-16. PubMed  
686 PMID: 27558425; PubMed Central PMCID: PMCPMC5068539.
- 687 32. Moss B. *Fields virology.* Chapter. 2001;74:2905-45.
- 688 33. Bisht H, Weisberg AS, Moss B. Vaccinia virus I1 protein is required for cell entry and membrane fusion. *J*  
689 *Virol.* 2008;82(17):8687-94. Epub 2008/07/04. doi: 10.1128/JVI.00852-08. PubMed PMID: 18596103; PubMed  
690 Central PMCID: PMCPMC2519644.
- 691 34. Fogg C, Lustig S, Whitbeck JC, Eisenberg RJ, Cohen GH, Moss B. Protective immunity to vaccinia virus  
692 induced by vaccination with multiple recombinant outer membrane proteins of intracellular and extracellular

- 693 virions. *J Virol.* 2004;78(19):10230-7. Epub 2004/09/16. doi: 10.1128/JVI.78.19.10230-10237.2004. PubMed  
694 PMID: 15367588; PubMed Central PMCID: PMCPMC516428.
- 695 35. Hooper JW, Custer DM, Thompson E. Four-gene-combination DNA vaccine protects mice against a lethal  
696 vaccinia virus challenge and elicits appropriate antibody responses in nonhuman primates. *Virology.*  
697 2003;306(1):181-95. Epub 2003/03/07. doi: 10.1016/s0042-6822(02)00038-7. PubMed PMID: 12620810.
- 698 36. Wolffe EJ, Vijaya S, Moss B. A myristylated membrane protein encoded by the vaccinia virus L1R open  
699 reading frame is the target of potent neutralizing monoclonal antibodies. *Virology.* 1995;211(1):53-63. Epub  
700 1995/08/01. doi: 10.1006/viro.1995.1378. PubMed PMID: 7645236.
- 701 37. Gilchuk I, Gilchuk P, Sapparapu G, Lampley R, Singh V, Kose N, et al. Cross-Neutralizing and Protective  
702 Human Antibody Specificities to Poxvirus Infections. *Cell.* 2016;167(3):684-94 e9. Epub 2016/10/22. doi:  
703 10.1016/j.cell.2016.09.049. PubMed PMID: 27768891; PubMed Central PMCID: PMCPMC5093772.
- 704 38. Mucker EM, Wollen-Roberts SE, Kimmel A, Shamblin J, Sampey D, Hooper JW. Intranasal monkeypox  
705 marmoset model: Prophylactic antibody treatment provides benefit against severe monkeypox virus disease.  
706 *PLoS Negl Trop Dis.* 2018;12(6):e0006581. Epub 2018/06/22. doi: 10.1371/journal.pntd.0006581. PubMed PMID:  
707 29927927; PubMed Central PMCID: PMCPMC6029809 employed by Biofactura Inc., a company that has licensing  
708 rights related to the monoclonal antibodies used in this study. No other competing interests exist.
- 709 39. Lustig S, Fogg C, Whitbeck JC, Eisenberg RJ, Cohen GH, Moss B. Combinations of polyclonal or  
710 monoclonal antibodies to proteins of the outer membranes of the two infectious forms of vaccinia virus protect  
711 mice against a lethal respiratory challenge. *J Virol.* 2005;79(21):13454-62. doi: 10.1128/JVI.79.21.13454-  
712 13462.2005. PubMed PMID: 16227266; PubMed Central PMCID: PMCPMC1262616.
- 713 40. Ichihashi Y. Extracellular enveloped vaccinia virus escapes neutralization. *Virology.* 1996;217(2):478-85.  
714 Epub 1996/03/15. doi: 10.1006/viro.1996.0142. PubMed PMID: 8610439.
- 715 41. Schmidt FI, Bleck CK, Helenius A, Mercer J. Vaccinia extracellular virions enter cells by macropinocytosis  
716 and acid-activated membrane rupture. *EMBO J.* 2011;30(17):3647-61. Epub 2011/07/28. doi:  
717 10.1038/emboj.2011.245. PubMed PMID: 21792173; PubMed Central PMCID: PMCPMC3181475.
- 718 42. Vanderplasschen A, Hollinshead M, Smith GL. Intracellular and extracellular vaccinia virions enter cells  
719 by different mechanisms. *J Gen Virol.* 1998;79 ( Pt 4):877-87. Epub 1998/05/06. doi: 10.1099/0022-1317-79-4-  
720 877. PubMed PMID: 9568984.
- 721 43. Law M, Carter GC, Roberts KL, Hollinshead M, Smith GL. Ligand-induced and nonfusogenic dissolution of  
722 a viral membrane. *Proc Natl Acad Sci U S A.* 2006;103(15):5989-94. Epub 2006/04/06. doi:  
723 10.1073/pnas.0601025103. PubMed PMID: 16585508; PubMed Central PMCID: PMCPMC1424662.
- 724 44. FDA. FDA approves drug to treat smallpox 2021 [cited 2022 April 29]. Available from:  
725 <https://www.fda.gov/drugs/news-events-human-drugs/fda-approves-drug-treat-smallpox>.
- 726 45. FDA. FDA approves the first drug with an indication for treatment of smallpox 2018 [cited 2022 April 29].  
727 Available from: [https://www.fda.gov/news-events/press-announcements/fda-approves-first-drug-indication-](https://www.fda.gov/news-events/press-announcements/fda-approves-first-drug-indication-treatment-smallpox)  
728 [treatment-smallpox](https://www.fda.gov/news-events/press-announcements/fda-approves-first-drug-indication-treatment-smallpox).
- 729 46. Earl PL, Americo JL, Moss B. Development and use of a vaccinia virus neutralization assay based on flow  
730 cytometric detection of green fluorescent protein. *J Virol.* 2003;77(19):10684-8. Epub 2003/09/13. doi:  
731 10.1128/jvi.77.19.10684-10688.2003. PubMed PMID: 12970455; PubMed Central PMCID: PMCPMC228521.
- 732 47. Senkevich TG, Moss B. Vaccinia virus H2 protein is an essential component of a complex involved in virus  
733 entry and cell-cell fusion. *J Virol.* 2005;79(8):4744-54. Epub 2005/03/30. doi: 10.1128/JVI.79.8.4744-4754.2005.  
734 PubMed PMID: 15795260; PubMed Central PMCID: PMCPMC1069540.
- 735 48. Townsley AC, Weisberg AS, Wagenaar TR, Moss B. Vaccinia virus entry into cells via a low-pH-dependent  
736 endosomal pathway. *J Virol.* 2006;80(18):8899-908. Epub 2006/08/31. doi: 10.1128/JVI.01053-06. PubMed  
737 PMID: 16940502; PubMed Central PMCID: PMCPMC1563910.
- 738 49. Bengali Z, Satheshkumar PS, Yang Z, Weisberg AS, Paran N, Moss B. Drosophila S2 cells are non-  
739 permissive for vaccinia virus DNA replication following entry via low pH-dependent endocytosis and early  
740 transcription. *PLoS One.* 2011;6(2):e17248. Epub 2011/02/25. doi: 10.1371/journal.pone.0017248. PubMed  
741 PMID: 21347205; PubMed Central PMCID: PMCPMC3039670.

- 742 50. Priyamvada L, Alabi P, Leon A, Kumar A, Sambhara S, Olson VA, et al. Discovery of Retro-1 Analogs  
743 Exhibiting Enhanced Anti-vaccinia Virus Activity. *Front Microbiol.* 2020;11:603. Epub 2020/05/12. doi:  
744 10.3389/fmicb.2020.00603. PubMed PMID: 32390964; PubMed Central PMCID: PMC7190985.
- 745 51. Johnson MC, Damon IK, Karem KL. A rapid, high-throughput vaccinia virus neutralization assay for  
746 testing smallpox vaccine efficacy based on detection of green fluorescent protein. *J Virol Methods.* 2008;150(1-  
747 2):14-20. Epub 2008/04/05. doi: 10.1016/j.jviromet.2008.02.009. PubMed PMID: 18387679.
- 748 52. Reynolds ES. The use of lead citrate at high pH as an electron-opaque stain in electron microscopy. *J Cell*  
749 *Biol.* 1963;17:208-12. doi: 10.1083/jcb.17.1.208. PubMed PMID: 13986422; PubMed Central PMCID:  
750 PMC2106263.
- 751 53. Li Y, Meyer H, Zhao H, Damon IK. GC content-based pan-pox universal PCR assays for poxvirus detection.  
752 *J Clin Microbiol.* 2010;48(1):268-76. Epub 20091111. doi: 10.1128/JCM.01697-09. PubMed PMID: 19906902;  
753 PubMed Central PMCID: PMC2812294.
- 754 54. Americo JL, Earl PL, Moss B. Droplet digital PCR for rapid enumeration of viral genomes and particles  
755 from cells and animals infected with orthopoxviruses. *Virology.* 2017;511:19-22. Epub 20170810. doi:  
756 10.1016/j.virol.2017.08.005. PubMed PMID: 28802157; PubMed Central PMCID: PMC5623639.
- 757 55. Laliberte JP, Weisberg AS, Moss B. The membrane fusion step of vaccinia virus entry is cooperatively  
758 mediated by multiple viral proteins and host cell components. *PLoS Pathog.* 2011;7(12):e1002446. Epub  
759 2011/12/24. doi: 10.1371/journal.ppat.1002446. PubMed PMID: 22194690; PubMed Central PMCID:  
760 PMC3240603.
- 761 56. Cox J, Hein MY, Lubner CA, Paron I, Nagaraj N, Mann M. Accurate proteome-wide label-free  
762 quantification by delayed normalization and maximal peptide ratio extraction, termed MaxLFQ. *Mol Cell*  
763 *Proteomics.* 2014;13(9):2513-26. Epub 2014/06/20. doi: 10.1074/mcp.M113.031591. PubMed PMID: 24942700;  
764 PubMed Central PMCID: PMC4159666.
- 765
- 766

# Figure 1

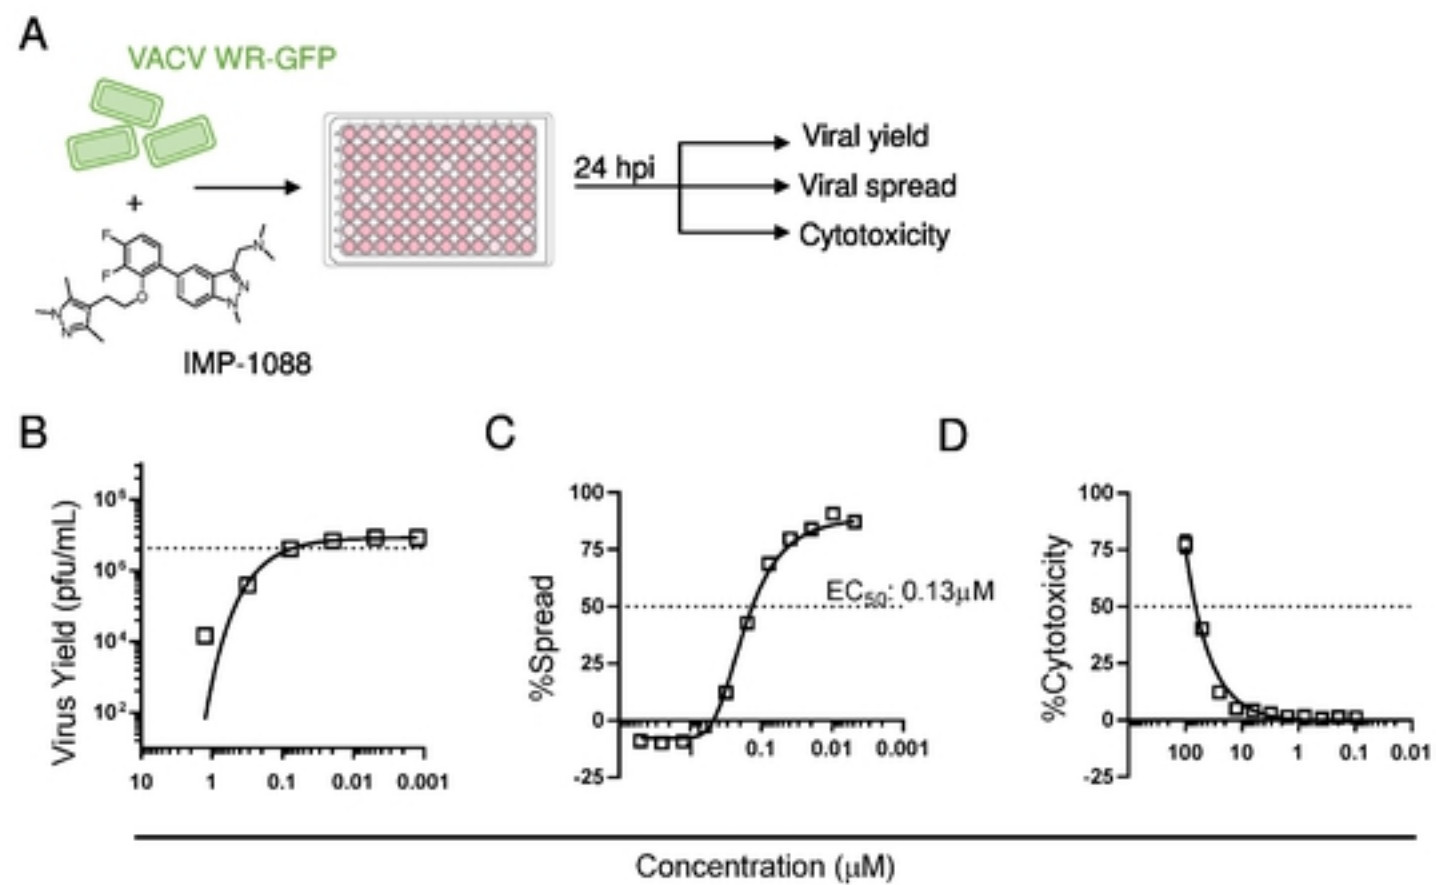



# Figure 2

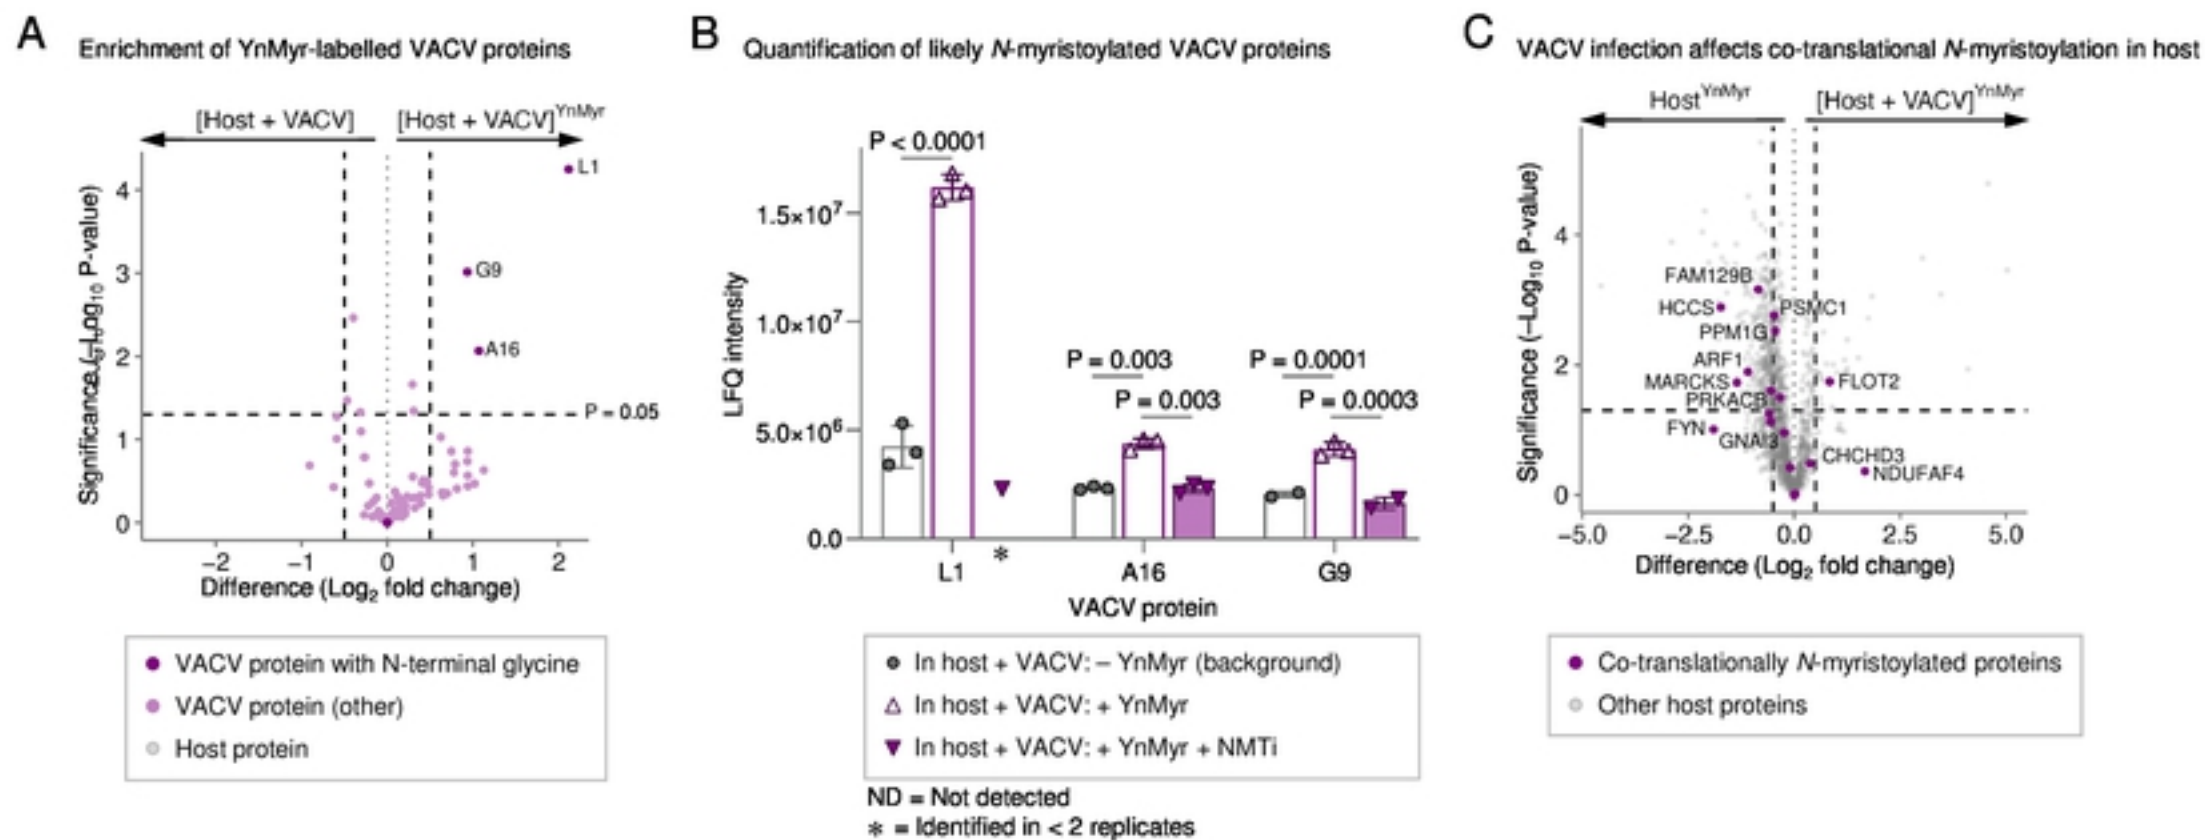



**Figure 3**

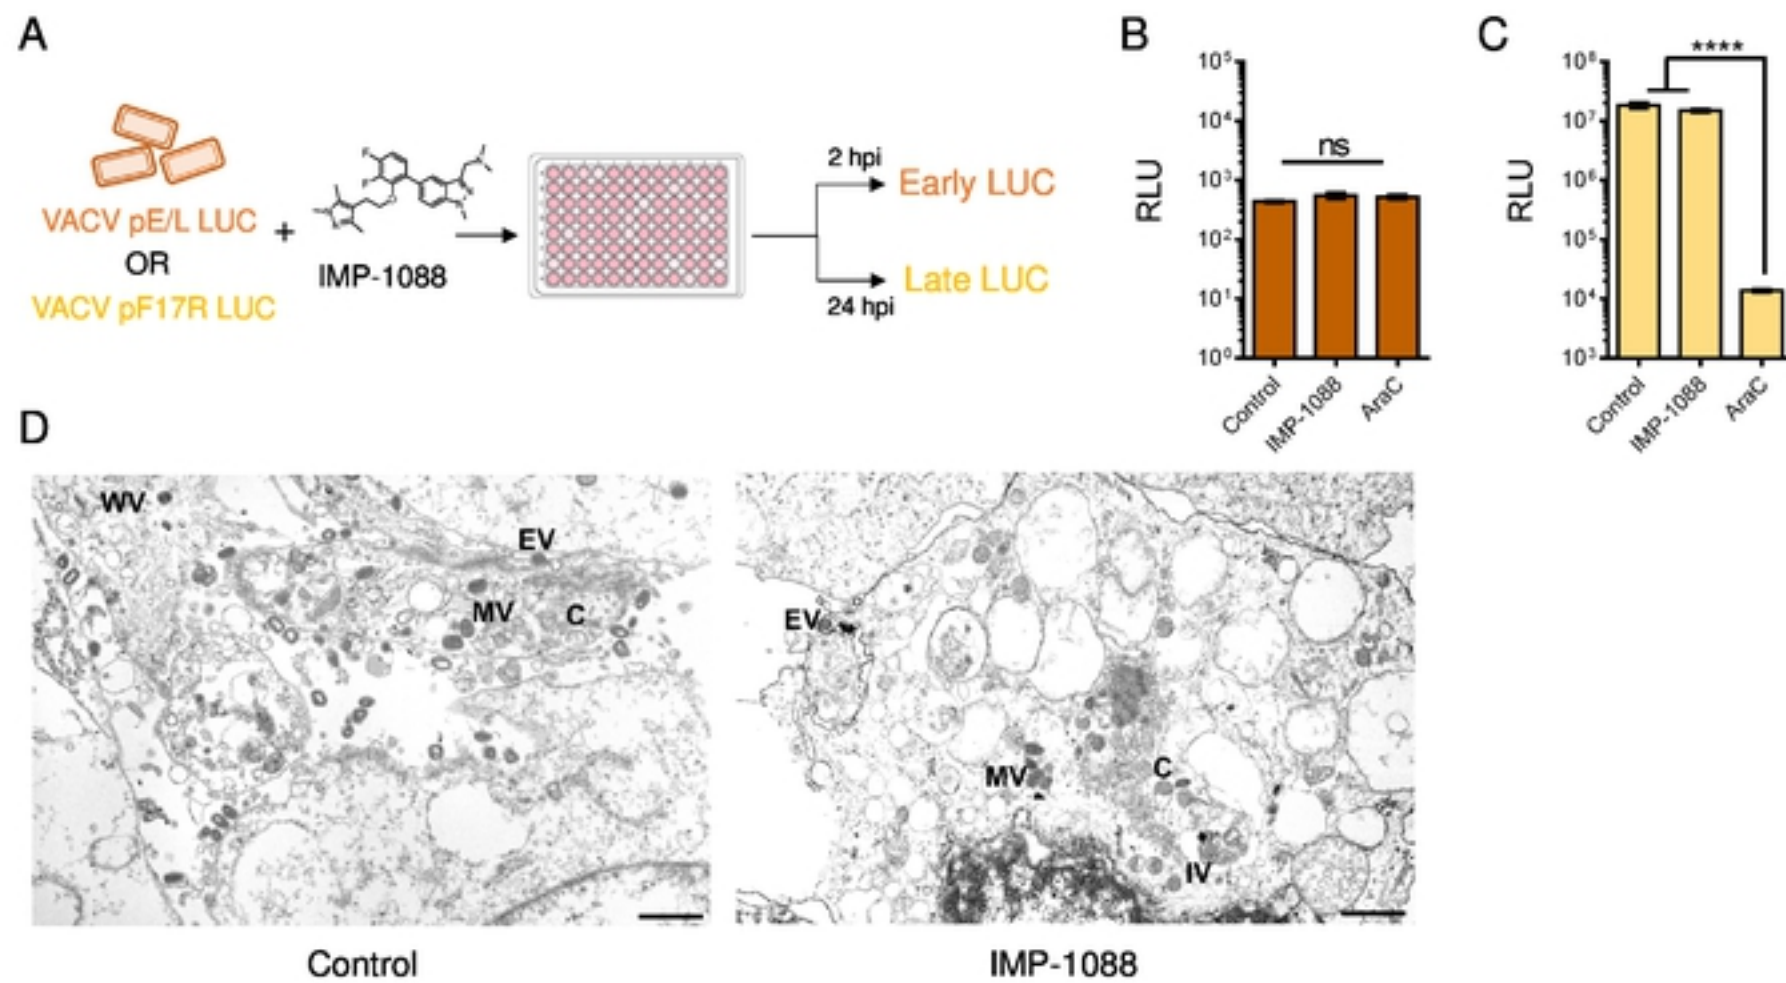

# Figure 4

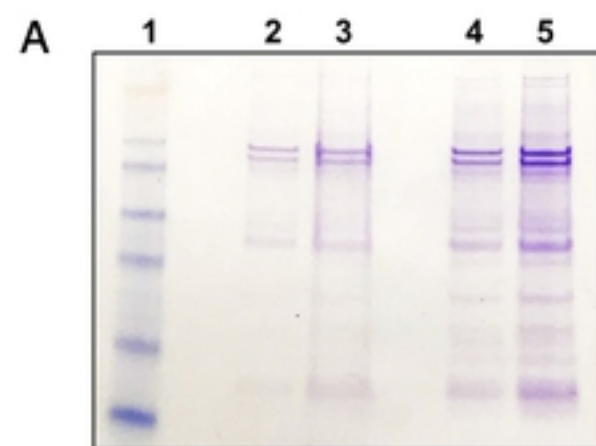

1. Ladder
2. IMP-1088 treated virus, 7.5 $\mu$ L
3. Control virus, 7.5 $\mu$ L
4. IMP-1088 treated virus, 15 $\mu$ L
5. Control virus, 15 $\mu$ L

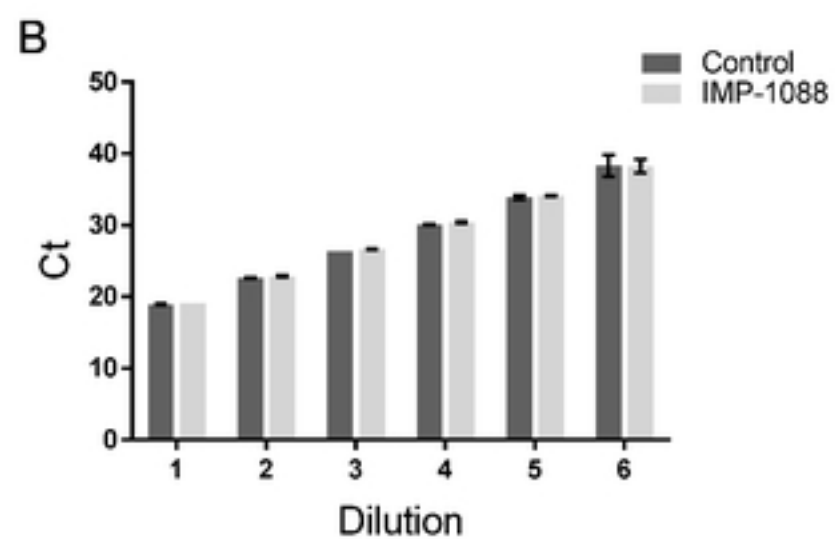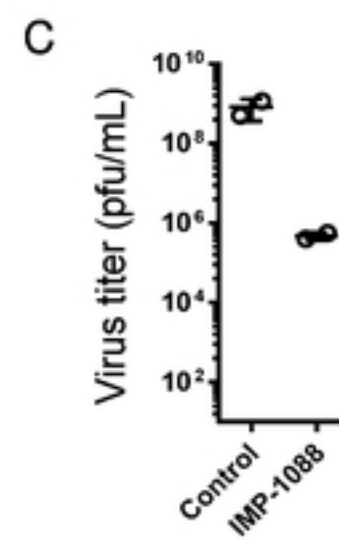

**Figure 5**

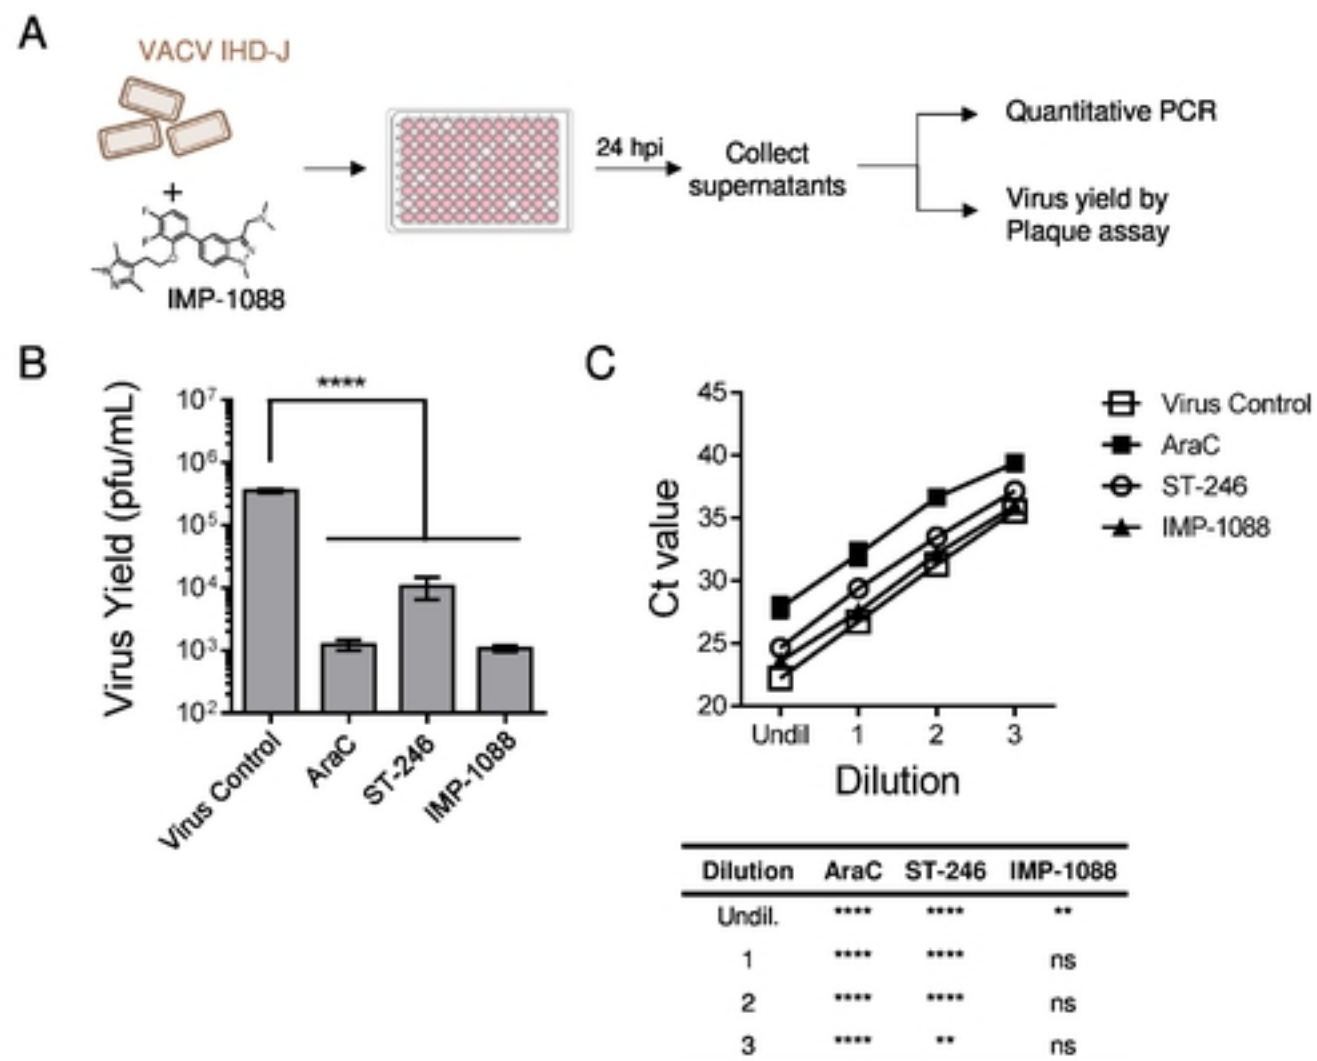

**Figure 6**

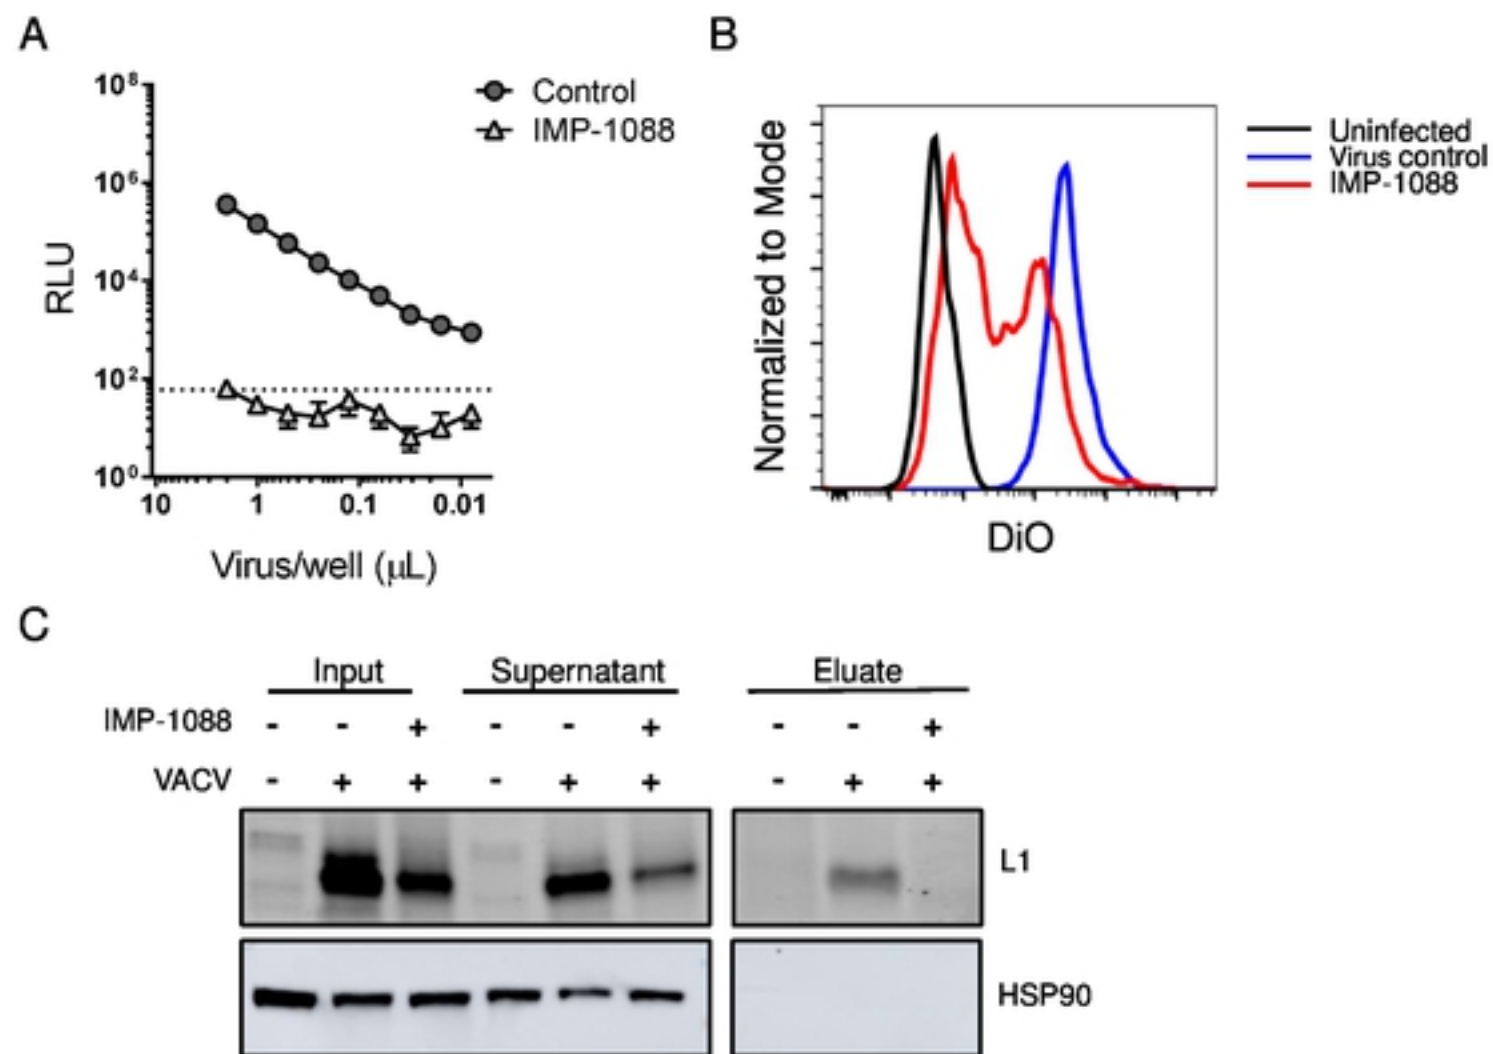

**Figure 7**

**A**

| Virus            | Genomes/PFU |
|------------------|-------------|
| VACV WR          | 5.3         |
| VACV WR-G9(G2A)  | 5.5         |
| VACV WR-A16(G2A) | 4.2         |

**B**

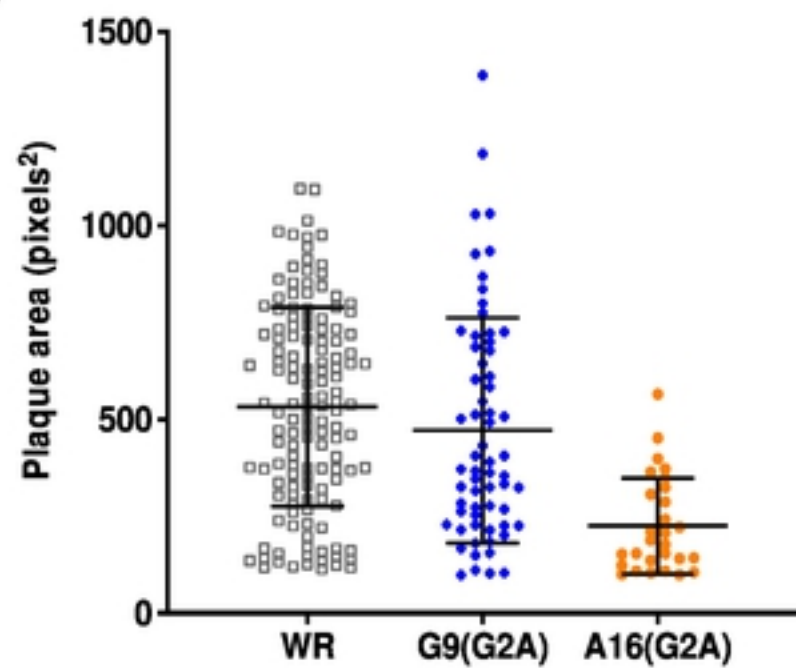

## Supplementary Table 1

| Protein ID | Protein name | N-terminus (first 20 amino-acids) | Potential <i>N</i> -Myr <sup>A</sup> | <i>N</i> -Myr predicted <sup>B</sup> | Identified |
|------------|--------------|-----------------------------------|--------------------------------------|--------------------------------------|------------|
| P16710     | A16          | MGAAVTLNRIKIAPGIADIR              | +                                    | +                                    | +          |
| P26673     | A47          | MGNKNIKPSKENRLSILSKD              | +                                    | +                                    | -          |
| P68600     | C7           | MGIQHEFDIINGDIALRNL               | +                                    | -                                    | -          |
| P04311     | D9           | MGITMDEEVIFETPRELISI              | +                                    | -                                    | -          |
| P68446     | E7           | MGTAATIQTPTKLMNKENAE              | +                                    | +                                    | -          |
| Q80HX7     | F11          | MGFCIPSRSKMLKRGSRKSS              | +                                    | -                                    | -          |
| P24358     | F5           | MGTNGVRVVFVILYLLAVCGC             | +                                    | -                                    | -          |
| Q80HX0     | G5           | MGIKNLKSLLLENKSLTILD              | +                                    | -                                    | -          |
| P07611     | G9           | MGGGVSVELPKRDPPPGVPT              | +                                    | +                                    | +          |
| P07612     | L1           | MGAAASIQTTVNTLSEISS               | +                                    | +                                    | +          |
| Q89121     | VPK2         | MGVANDSSPEYQWMSPHRLS              | +                                    | -                                    | -          |

<sup>A</sup> Potential *N*-myristoylation: potential due to presence of glycine (G) at position two at protein N-terminus.

<sup>B</sup> *N*-Myristoylation prediction: Sequence tested with Myristoylator (<https://web.expasy.org/myristoylator/>).

# Supplementary figure 1

Effect of NMT inhibition on YnMyr-enrichment of VACV proteins

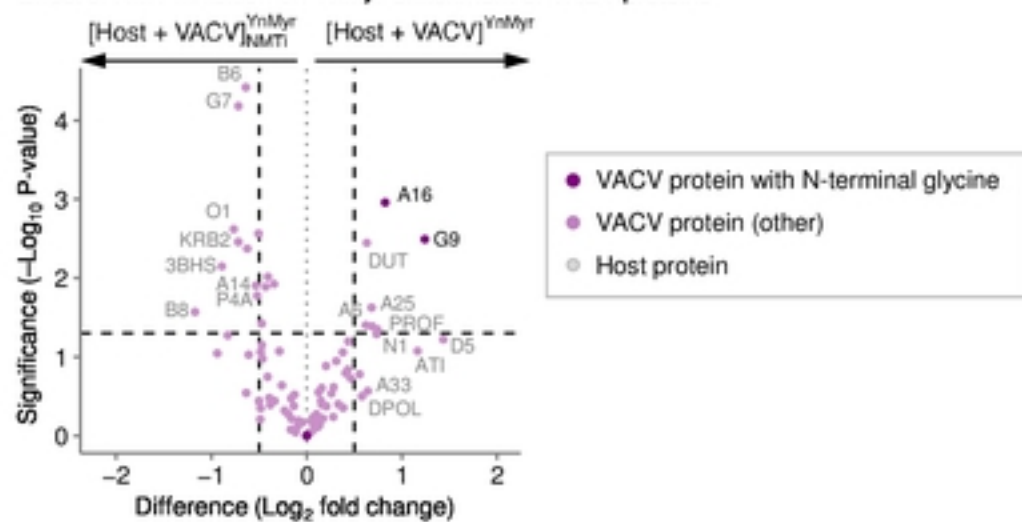



## Supplementary figure 2

Target engagement of NMTi on host NMT substrates

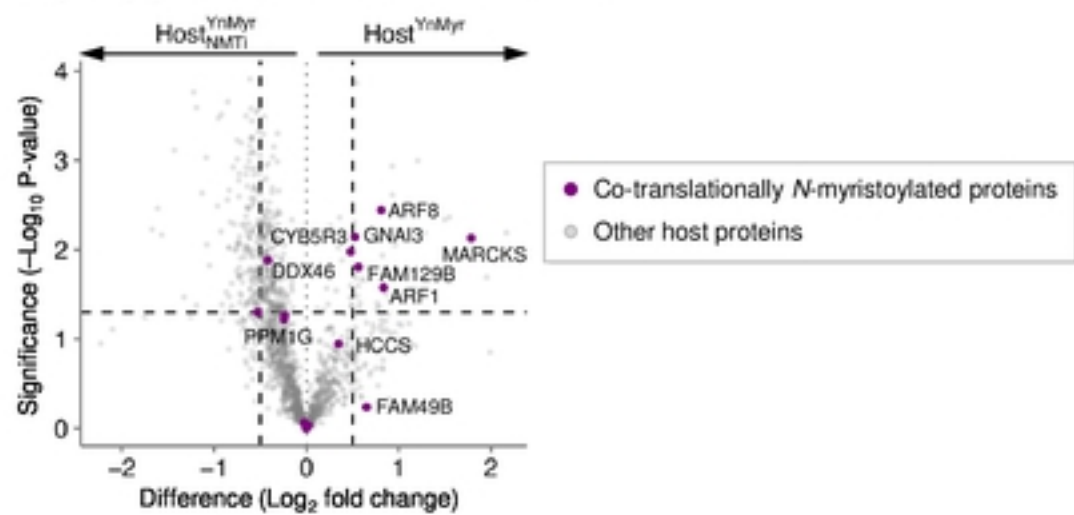

# Supplementary figure 3

VACV infection affects post-translational *N*-myristoylation in host

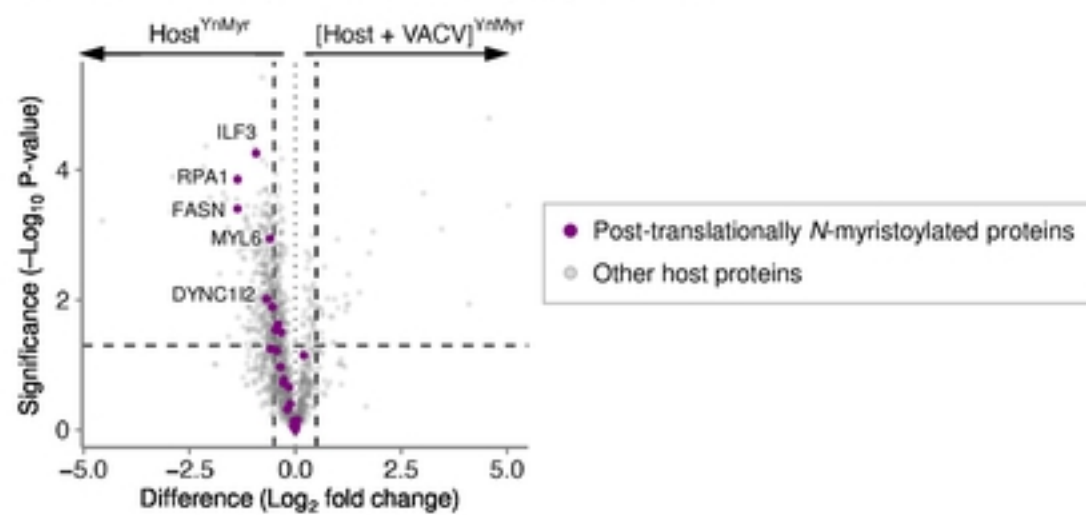

Source: https://www.biorxiv.org/content/10.1101/2022.06.13.495866v1.full.pdf
